# Supplementary material for: The entropic penalty for associative reactions and their physical treatment during routine computations
Source: Royal Society of Chemistry journal article supplement (doi:10.1039/d3cp00970j), 2023-01-01
Supplement: d3cp00970j1.pdf [file d3cp00970j1.pdf]

# **Supporting Information: The Entropic Penalty for Associative Reactions and their Physical Treatment during Routine Computations**

Jama Ariai\* and Urs Gellrich\*

Justus Liebig University, Institute of Organic Chemistry, Heinrich-Buff-Ring 17, 35392 Giessen, Germany.

E-mail: [urs.gellrich@org.chemie.uni-giessen.de](mailto:urs.gellrich@org.chemie.uni-giessen.de)

# Table of Contents

|     |                                                                   |     |
|-----|-------------------------------------------------------------------|-----|
| 1   | Derivation of the Equations of Solvation Entropy.....             | S1  |
| 1.1 | Translational Entropy of Solvation .....                          | S1  |
| 1.2 | Rotational Entropy of Solvation.....                              | S1  |
| 1.3 | Cavitation Entropy.....                                           | S2  |
| 2   | Computed Gibbs Free Energies.....                                 | S3  |
| 2.1 | Scatter Plots for Reactions with Decreasing Particle Number ..... | S3  |
| 2.2 | Statistics.....                                                   | S5  |
| 2.3 | Bimolecular Reactions .....                                       | S6  |
| 2.4 | Calculated Entropy-Correction term.....                           | S9  |
| 2.5 | Computed Gibbs Free Energies .....                                | S13 |
| 2.6 | Computed Entropies .....                                          | S17 |
| 3   | Black-Box Algorithm for Solvation Entropy .....                   | S21 |
| 3.1 | General Procedure: Flow-Chart.....                                | S21 |
| 3.2 | Benchmark of Molecular Volume .....                               | S22 |
| 3.3 | Database.....                                                     | S23 |
| 3.4 | Numerical Examples .....                                          | S30 |

# 1 Derivation of the Equations of Solvation Entropy

We present a detailed derivation of the translational entropy of solvation (eq 4), rotational entropy of solvation (eq 5), and cavitation entropy (eq 6) based on the formalism presented by Garza.<sup>1</sup> We recall the equations mentioned in the original manuscript by Garza with the prefix 'G', so that G2 refers to eq 2 in the original manuscript by Garza.

## 1.1 Translational Entropy of Solvation

We start with the general expression of the translational entropy (G3 in G2)

$$S_{\text{trans}} = R \left( \ln q_{\text{trans}} + \frac{5}{2} \right) \quad (\text{S1})$$

where  $q_{\text{trans}} = V(2\pi mk_{\text{B}}T/h^2)^{3/2}$  is the translational partition function (G3). For solution-phase, the volume is the product of the number of accessible cavities and the cavity volume ( $N_{\text{cav}}V_{\text{cav}}$ ), while the ideal gas volume  $V_{\text{gas}}^{\text{ideal}}$  is used for the gas-phase. Thus, the translational entropy of solvation

$$\Delta_{\text{solv}} S^{\text{trans}} = S_{\text{soln}}^{\text{trans}} - S_{\text{gas}}^{\text{trans}} = R \ln \left( \frac{q_{\text{trans,soln}}}{q_{\text{trans,gas}}} \right) \quad (\text{S2})$$

which simplifies to the final expression  $\Delta_{\text{solv}} S^{\text{trans}} = R \ln \left( N_{\text{cav}} V_{\text{cav}} / V_{\text{gas}}^{\text{ideal}} \right)$  for the translational entropy of solvation (eq 4).

## 1.2 Rotational Entropy of Solvation

The rotational solution-phase entropy is

$$S_{\text{rot}} = R \left( \ln (q_{\text{rot}}) + T \left( \frac{\partial \ln (q_{\text{rot}})}{\partial T} \right)_V \right) + S_{\text{trans}}' - S_{\text{trans}}'' \quad (\text{G11})$$

where  $S_{\text{trans}}'$  and  $S_{\text{trans}}''$  are the translational solution-phase entropy at volume  $V' = N_{\text{cav}}4\pi(r_{\text{cav}} - r_{\text{gyr}})^3/3$  and  $V'' = N_{\text{cav}}4\pi r_{\text{cav}}^3/3$ , respectively. The first two terms are identical to the gas-phase formalism, hence the rotational entropy of solvation simplifies to

$$\Delta_{\text{solv}} S^{\text{rot}} = S_{\text{soln}}^{\text{rot}} - S_{\text{gas}}^{\text{rot}} = S_{\text{trans}}' - S_{\text{trans}}'' \quad (\text{S3})$$

which is a scenario comparable to the translational entropy of solvation ( $S_{\text{trans}}(V_1) - S_{\text{trans}}(V_2)$ ). Accordingly, the final expression is

$$\Delta_{\text{solv}} S^{\text{rot}} = R \ln \left( \frac{(r_{\text{cav}} - r_{\text{gyr}})^3}{r_{\text{cav}}^3} \right) = 3R \ln \left( 1 - \frac{r_{\text{gyr}}}{r_{\text{cav}}} \right) \quad (\text{S4})$$

which is identical to eq 5.

### 1.3 Cavitation Entropy

The cavitation entropy is calculated according to the original formulation (G25 in G32) with the only exception that  $y' = (3y/(1-y)) + 4.5(y/(1-y))^2$  was condensed for brevity.

## 2 Computed Gibbs Free Energies

### 2.1 Scatter Plots for Reactions with Decreasing Particle Number

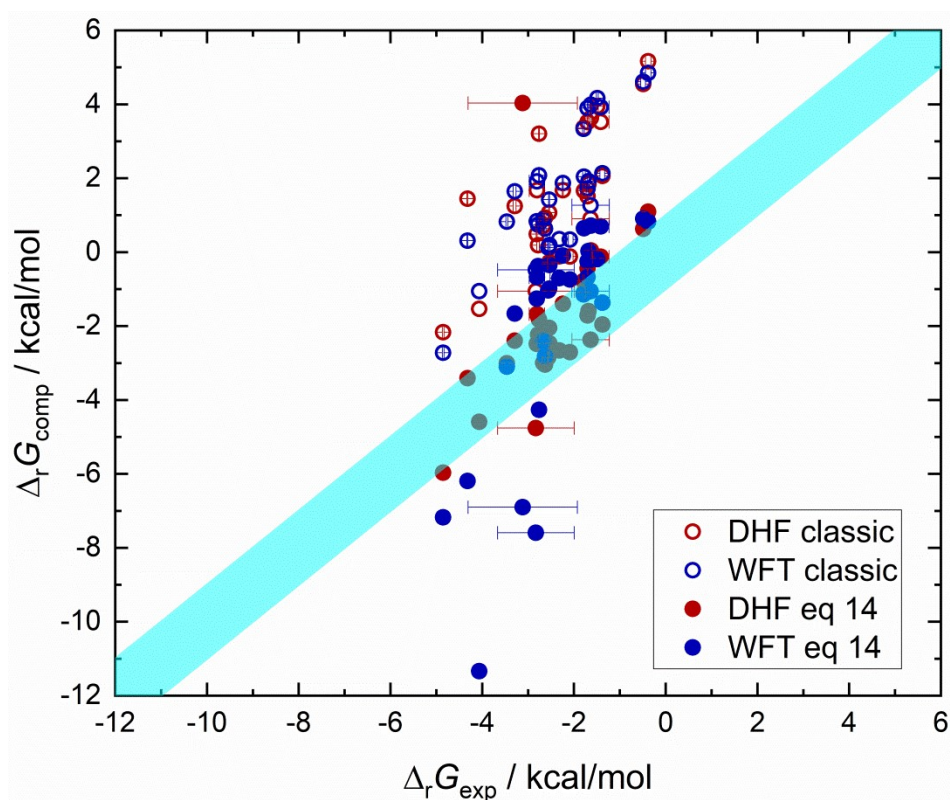

Figure S1: Scatter plot of computed Gibbs free solution-phase reaction energies versus experimental values for reactions with decreasing particle number. The red and blue circles refer to revDSD-PBEP86-D4 and DLPNO-CCSD(T) level of theory, respectively. Hollow and filled symbols refer to uncorrected (i.e., classic approach) and corrected values according to eq 14, respectively. The blue shaded area denotes the regime of chemical accuracy ( $\pm 1$  kcal/mol). Uncorrected values for entry 39 ( $>14$  kcal/mol) are omitted for clarity.

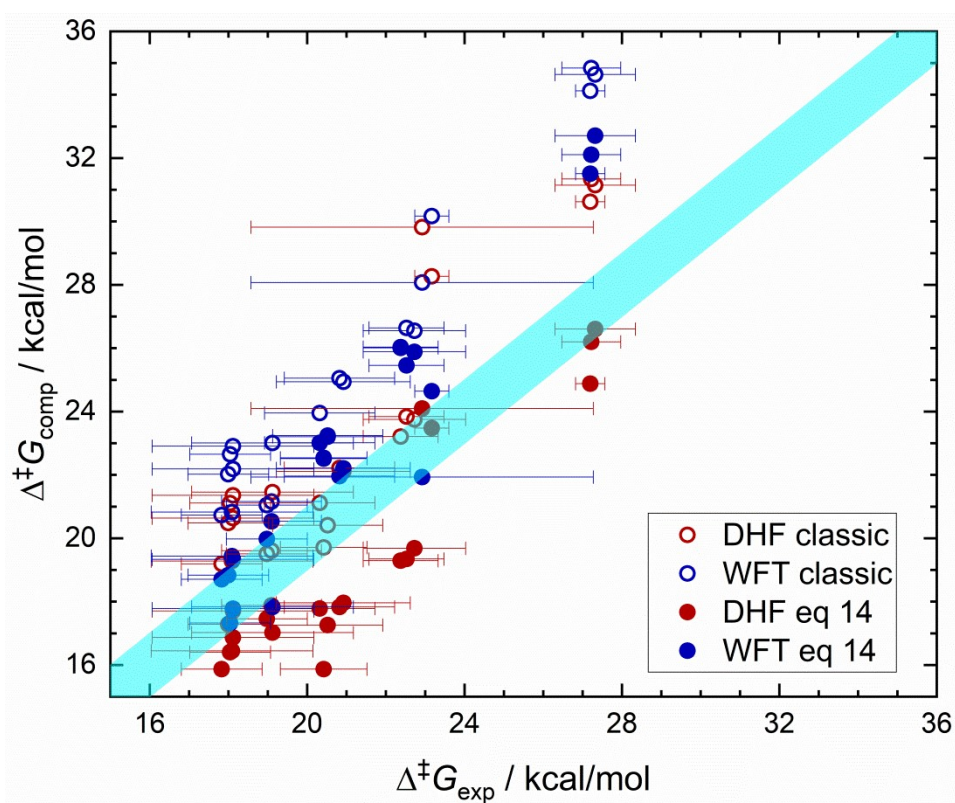

Figure S2: Scatter plot of computed Gibbs free solution-phase activation energies versus experimental values for reactions with decreasing particle number. The red and blue circles refer to revDSD-PBEP86-D4 and DLPNO-CCSD(T) level of theory, respectively. Hollow and filled symbols refer to uncorrected (i.e., classic approach) and corrected values according to eq 14, respectively. The blue shaded area denotes the regime of chemical accuracy ( $\pm 1$  kcal/mol).

## 2.2 Statistics

Table S1: Mean absolute error (MAE), mean signed error (MSE), mean absolute deviation (MAD), minimum error (min), and maximum error (max) of the Gibbs free energies (comp-exp) regarding bimolecular reactions in kcal/mol. Values in parentheses and brackets are corrected for the entropic penalty using eq 13 and 14, respectively.

|     | $\Delta^\ddagger G_{\text{soln}}$ |        | $\Delta_{\text{r}} G_{\text{soln}}$ |        |
|-----|-----------------------------------|--------|-------------------------------------|--------|
|     | WFT                               | DHF    | WFT                                 | DHF    |
| MAE | 4.2                               | 2.2    | 4.4                                 | 4.3    |
|     | (1.6)                             | (2.8)  | (1.5)                               | (1.5)  |
|     | [0.8]                             | [2.0]  | [1.1]                               | [1.0]  |
| MSE | 4.2                               | 2.1    | 4.4                                 | 4.3    |
|     | (-0.4)                            | (-2.5) | (1.3)                               | (1.1)  |
|     | [0.3]                             | [-1.8] | [0.7]                               | [0.5]  |
| MAD | 1.2                               | 1.5    | 1.5                                 | 1.5    |
|     | (1.5)                             | (1.7)  | (1.3)                               | (1.4)  |
|     | [0.8]                             | [1.1]  | [1.0]                               | [0.9]  |
| min | 2.1                               | -0.7   | 2.1                                 | 1.8    |
|     | (-3.6)                            | (-6.5) | (-1.3)                              | (-1.5) |
|     | [-1.7]                            | [-4.6] | [-1.7]                              | [-1.9] |
| max | 7.6                               | 6.9    | 19.4                                | 17.7   |
|     | (3.7)                             | (1.8)  | (14.6)                              | (13.0) |
|     | [2.8]                             | [1.2]  | [8.8]                               | [7.2]  |

Table S2: Mean absolute error (MAE), mean signed error (MSE), mean absolute deviation (MAD), minimum error (min), and maximum error (max) of the solution-phase entropy (comp-exp) regarding bimolecular reactions in kcal/mol.

|     | $-T\Delta^\ddagger S_{\text{soln}}$ | $-T\Delta_{\text{r}} S_{\text{soln}}$ |
|-----|-------------------------------------|---------------------------------------|
| MAE | 1.6                                 | 2.3                                   |
| MSE | -0.7                                | 2.2                                   |
| MAD | 1.6                                 | 1.0                                   |
| min | -4.0                                | -0.5                                  |
| max | 3.4                                 | 4.4                                   |

## 2.3 Bimolecular Reactions

Table S3: Computed Gibbs free reaction energies for bimolecular reactions. Energies are given as the difference to experimental values. WFT and DHF denote DLPNO-CCSD(T) and revDSD-PBEP86-D4 level of theory, respectively. Entropy-corrected values are given according to eq 13 and eq 14.

| Entry | Reaction | Solvent                       | T / K | classic |     | eq 13 |      | eq 14 |      | exp error |
|-------|----------|-------------------------------|-------|---------|-----|-------|------|-------|------|-----------|
|       |          |                               |       | WFT     | DHF | WFT   | DHF  | WFT   | DHF  |           |
| 9     | 7a       | DCM                           | 270   | 3.0     | 2.5 | -0.2  | -0.7 | -0.1  | -0.5 | 0.0       |
| 10    | 7b       | C <sub>6</sub> H <sub>6</sub> | 314   | 2.3     | 1.8 | -0.9  | -1.5 | -1.4  | -1.9 | 0.8       |
| 11    | 8a       | CCl <sub>4</sub>              | 298   | 5.2     | 5.5 | 1.8   | 2.1  | 1.2   | 1.5  | 0.1       |
| 12    | 8b       | CCl <sub>4</sub>              | 298   | 5.1     | 5.0 | 1.8   | 1.8  | 1.2   | 1.1  | 0.1       |
| 13    | 8c       | CCl <sub>4</sub>              | 298   | 3.5     | 3.4 | 0.1   | 0.1  | -0.5  | -0.6 | 0.1       |
| 14    | 8d       | CCl <sub>4</sub>              | 298   | 5.7     | 5.4 | 2.3   | 2.1  | 1.5   | 1.3  | 0.0       |
| 15    | 8e       | CCl <sub>4</sub>              | 298   | 5.6     | 5.3 | 2.6   | 2.3  | 2.0   | 1.7  | 0.0       |
| 16    | 8f       | CCl <sub>4</sub>              | 298   | 3.6     | 3.5 | 0.4   | 0.3  | 0.2   | 0.1  | 0.0       |
| 17    | 8g       | CCl <sub>4</sub>              | 298   | 5.6     | 5.2 | 2.4   | 2.0  | 1.6   | 1.3  | 0.0       |
| 18    | 8h       | CCl <sub>4</sub>              | 298   | 3.4     | 3.2 | 0.6   | 0.4  | 0.2   | 0.0  | 0.0       |
| 19    | 8i       | CCl <sub>4</sub>              | 298   | 3.8     | 3.4 | 0.7   | 0.3  | 1.1   | 0.7  | 0.0       |
| 20    | 8j       | CCl <sub>4</sub>              | 298   | 5.1     | 5.2 | 1.9   | 1.9  | 1.0   | 1.0  | 0.0       |
| 21    | 8k       | CCl <sub>4</sub>              | 298   | 4.0     | 3.6 | 0.7   | 0.4  | 0.8   | 0.5  | 0.0       |
| 22    | 8l       | CCl <sub>4</sub>              | 298   | 2.7     | 2.2 | -0.3  | -0.7 | 0.2   | -0.3 | 0.0       |
| 23    | 8m       | CCl <sub>4</sub>              | 298   | 3.3     | 3.6 | -0.1  | 0.2  | -0.7  | -0.4 | 0.0       |
| 24    | 8n       | CCl <sub>4</sub>              | 298   | 3.6     | 3.4 | 0.6   | 0.4  | -0.1  | -0.3 | 0.0       |
| 25    | 8o       | CCl <sub>4</sub>              | 298   | 4.8     | 6.0 | 1.2   | 2.3  | -0.2  | 0.9  | 0.0       |
| 26    | 8p       | CCl <sub>4</sub>              | 298   | 3.5     | 3.0 | 0.7   | 0.1  | 1.1   | 0.5  | 0.0       |
| 27    | 8q       | CCl <sub>4</sub>              | 298   | 3.6     | 3.3 | 1.1   | 0.8  | 0.7   | 0.3  | 0.0       |
| 28    | 8r       | CCl <sub>4</sub>              | 298   | 4.9     | 4.5 | 1.9   | 1.5  | 1.3   | 0.9  | 0.0       |
| 29    | 8s       | CCl <sub>4</sub>              | 298   | 4.3     | 4.3 | 1.1   | 1.1  | 0.5   | 0.5  | 0.0       |
| 30    | 8t       | CCl <sub>4</sub>              | 298   | 4.6     | 5.8 | 1.0   | 2.2  | -0.2  | 0.9  | 0.0       |
| 31    | 8u       | CCl <sub>4</sub>              | 298   | 2.1     | 2.7 | -1.3  | -0.7 | -1.7  | -1.1 | 0.0       |
| 32    | 8v       | CCl <sub>4</sub>              | 298   | 4.1     | 3.9 | 1.2   | 1.0  | 1.0   | 0.8  | 0.0       |
| 33    | 8w       | CCl <sub>4</sub>              | 298   | 2.9     | 2.5 | 0.0   | -0.4 | -0.4  | -0.7 | 0.4       |
| 34    | 8x       | CCl <sub>4</sub>              | 298   | 5.3     | 4.9 | 2.3   | 1.9  | 1.7   | 1.3  | 0.2       |



| 2  | Computed |                                |         | Gibbs |         | Free |       | Energies |       |     |           |
|----|----------|--------------------------------|---------|-------|---------|------|-------|----------|-------|-----|-----------|
|    | Entry    | Reaction                       | Solvent | T / K | classic |      | eq 13 |          | eq 14 |     | exp error |
|    |          |                                |         |       | WFT     | DHF  | WFT   | DHF      | WFT   | DHF |           |
| 35 | 8y       | CCl <sub>4</sub>               | 298     | 4.7   | 4.5     | 1.9  | 1.6   | 1.4      | 1.1   | 0.2 |           |
| 36 | 8z       | CCl <sub>4</sub>               | 298     | 2.7   | 2.2     | -0.3 | -0.8  | 0.1      | -0.3  | 0.2 |           |
| 37 | 8z       | C <sub>6</sub> H <sub>6</sub>  | 298     | 2.4   | 2.0     | -0.6 | -1.1  | -0.2     | -0.6  | 0.1 |           |
| 38 | 8z       | C <sub>6</sub> H <sub>12</sub> | 298     | 2.7   | 2.3     | 0.0  | -0.4  | 0.5      | 0.1   | 0.0 |           |
| 39 | 9        | diglyme                        | 348     | 19.4  | 17.7    | 14.6 | 13.0  | 8.8      | 7.2   | 1.2 |           |

Table S4: Computed Gibbs free activation barriers for bimolecular reactions. Energies are given as the difference to experimental values. WFT and DHF denote DLPNO-CCSD(T) and revDSD-PBEP86-D4 level of theory, respectively. Entropy-corrected values are given according to eq 13 and eq 14.

| Entry | Reaction | Solvent                        | T / K | classic |      | eq 13 |      | eq 14 |      | exp error |
|-------|----------|--------------------------------|-------|---------|------|-------|------|-------|------|-----------|
|       |          |                                |       | WFT     | DHF  | WFT   | DHF  | WFT   | DHF  |           |
| 40    | 10       | CCl <sub>4</sub>               | 301   | 7.0     | 5.1  | 3.7   | 1.8  | 2.2   | 0.3  | 0.4       |
| 41    | 11       | C <sub>6</sub> H <sub>12</sub> | 301   | 4.0     | 1.2  | 0.1   | -2.7 | -0.1  | -3.0 | 1.7       |
| 42    | 11       | C <sub>6</sub> H <sub>6</sub>  | 301   | 4.2     | 1.4  | 0.1   | -2.7 | -0.2  | -3.0 | 1.4       |
| 43    | 11       | 1,4-dioxane                    | 301   | 3.6     | 0.8  | -0.5  | -3.4 | 0.3   | -2.5 | 1.4       |
| 44    | 11       | <i>i</i> PrOH                  | 301   | 2.7     | -0.1 | -1.9  | -4.8 | -0.4  | -3.3 | 1.4       |
| 45    | 11       | MeOH                           | 301   | 2.1     | -0.7 | -3.6  | -6.5 | -1.7  | -4.6 | 1.1       |
| 46    | 12       | C <sub>6</sub> H <sub>12</sub> | 301   | 3.8     | 1.0  | -0.9  | -3.7 | -0.2  | -3.0 | 1.3       |
| 47    | 12       | C <sub>6</sub> H <sub>6</sub>  | 301   | 4.1     | 1.3  | -0.8  | -3.6 | -0.4  | -3.2 | 1.0       |
| 48    | 12       | 1,4-dioxane                    | 301   | 3.6     | 0.8  | -1.4  | -4.2 | -0.3  | -3.1 | 1.0       |
| 49    | 13       | C <sub>6</sub> H <sub>12</sub> | 348   | 7.3     | 3.8  | 2.6   | -0.9 | 2.8   | -0.7 | 1.0       |
| 50    | 13       | C <sub>6</sub> H <sub>6</sub>  | 348   | 7.6     | 4.1  | 2.5   | -1.0 | 2.5   | -1.0 | 0.7       |
| 51    | 13       | acetone                        | 348   | 6.9     | 3.4  | 0.9   | -2.6 | 1.2   | -2.3 | 0.4       |
| 52    | 14a      | <i>n</i> -hexane               | 303   | 4.8     | 3.2  | 1.8   | 0.3  | 0.3   | -1.3 | 2.1       |
| 53    | 14a      | CHCl <sub>3</sub>              | 303   | 3.9     | 2.3  | 0.1   | -1.5 | -0.6  | -2.1 | 2.1       |
| 54    | 14a      | <i>n</i> PrOH                  | 303   | 4.1     | 2.5  | -0.2  | -1.7 | 1.1   | -0.4 | 2.1       |
| 55    | 14a      | H <sub>2</sub> O               | 303   | 2.7     | 1.2  | -3.2  | -4.7 | -0.1  | -1.6 | 2.1       |
| 56    | 14a      | TFEI                           | 303   | 2.1     | 0.5  | -2.3  | -3.8 | 0.3   | -1.2 | 1.3       |
| 57    | 14b      | <i>n</i> -hexane               | 303   | 4.6     | 3.1  | 1.4   | -0.2 | -0.1  | -1.6 | 1.0       |
| 58    | 14b      | <i>n</i> PrOH                  | 303   | 4.0     | 2.5  | -0.5  | -2.0 | 0.8   | -0.7 | 1.0       |

| 2     |          | Computed         | Gibbs | Free    | Energies |       |      |       |      |           |
|-------|----------|------------------|-------|---------|----------|-------|------|-------|------|-----------|
| Entry | Reaction | Solvent          | T / K | classic |          | eq 13 |      | eq 14 |      | exp error |
|       |          |                  |       | WFT     | DHF      | WFT   | DHF  | WFT   | DHF  |           |
| 59    | 14b      | TFE              | 303   | 2.1     | 0.5      | -2.5  | -4.1 | 0.0   | -1.5 | 1.0       |
| 60    | 14b      | H <sub>2</sub> O | 303   | 2.9     | 1.4      | -3.4  | -4.9 | -0.4  | -2.0 | 1.0       |
| 61    | 15       | THF              | 308   | 5.2     | 6.9      | -0.1  | 1.6  | -0.6  | 1.2  | 4.3       |

## 2.4 Calculated Entropy-Correction term

Table S5: Calculated correction for the entropic penalty  $\Delta G_{\text{corr}}$  (eq 16) given as additive correction to  $\Delta_r G_{\text{soln}}$  and  $\Delta^\ddagger G_{\text{soln}}$  (in kcal/mol) following the formalisms according to eq 13 and eq 14 (superior, cf. eq 15).

| Entry | Reaction | Solvent                       | T / K | eq 13 | eq 14 |
|-------|----------|-------------------------------|-------|-------|-------|
| 9     | 7a       | DCM                           | 270   | -3.2  | -3.1  |
| 10    | 7b       | C <sub>6</sub> H <sub>6</sub> | 314   | -3.3  | -3.7  |
| 11    | 8a       | CCl <sub>4</sub>              | 298   | -3.4  | -4.1  |
| 12    | 8b       | CCl <sub>4</sub>              | 298   | -3.3  | -3.9  |
| 13    | 8c       | CCl <sub>4</sub>              | 298   | -3.4  | -4.0  |
| 14    | 8d       | CCl <sub>4</sub>              | 298   | -3.3  | -4.1  |
| 15    | 8e       | CCl <sub>4</sub>              | 298   | -3.0  | -3.6  |
| 16    | 8f       | CCl <sub>4</sub>              | 298   | -3.2  | -3.4  |
| 17    | 8g       | CCl <sub>4</sub>              | 298   | -3.2  | -4.0  |
| 18    | 8h       | CCl <sub>4</sub>              | 298   | -2.8  | -3.2  |
| 19    | 8i       | CCl <sub>4</sub>              | 298   | -3.1  | -2.8  |
| 20    | 8j       | CCl <sub>4</sub>              | 298   | -3.3  | -4.1  |
| 21    | 8k       | CCl <sub>4</sub>              | 298   | -3.2  | -3.1  |
| 22    | 8l       | CCl <sub>4</sub>              | 298   | -3.0  | -2.5  |
| 23    | 8m       | CCl <sub>4</sub>              | 298   | -3.3  | -4.0  |
| 24    | 8n       | CCl <sub>4</sub>              | 298   | -3.0  | -3.7  |
| 25    | 8o       | CCl <sub>4</sub>              | 298   | -3.6  | -5.0  |
| 26    | 8p       | CCl <sub>4</sub>              | 298   | -2.9  | -2.4  |
| 27    | 8q       | CCl <sub>4</sub>              | 298   | -2.5  | -3.0  |
| 28    | 8r       | CCl <sub>4</sub>              | 298   | -3.0  | -3.6  |
| 29    | 8s       | CCl <sub>4</sub>              | 298   | -3.2  | -3.8  |
| 30    | 8t       | CCl <sub>4</sub>              | 298   | -3.6  | -4.9  |
| 31    | 8u       | CCl <sub>4</sub>              | 298   | -3.4  | -3.8  |
| 32    | 8v       | CCl <sub>4</sub>              | 298   | -2.9  | -3.1  |
| 33    | 8w       | CCl <sub>4</sub>              | 298   | -2.9  | -3.3  |
| 34    | 8x       | CCl <sub>4</sub>              | 298   | -3.0  | -3.6  |
| 35    | 8y       | CCl <sub>4</sub>              | 298   | -2.9  | -3.4  |
| 36    | 8z       | CCl <sub>4</sub>              | 298   | -3.0  | -2.6  |

| 2     | Computed | Gibbs                          | Free         | Energies |       |
|-------|----------|--------------------------------|--------------|----------|-------|
| Entry | Reaction | Solvent                        | <i>T</i> / K | eq 13    | eq 14 |
| 37    | 8z       | C <sub>6</sub> H <sub>6</sub>  | 298          | -3.0     | -2.6  |
| 38    | 8z       | C <sub>6</sub> H <sub>12</sub> | 298          | -2.7     | -2.2  |
| 39    | 9        | diglyme                        | 348          | -4.7     | -10.5 |
| 40    | 10       | CCl <sub>4</sub>               | 301          | -3.3     | -4.8  |
| 41    | 11       | C <sub>6</sub> H <sub>12</sub> | 301          | -3.9     | -4.1  |
| 42    | 11       | C <sub>6</sub> H <sub>6</sub>  | 301          | -4.1     | -4.4  |
| 43    | 11       | 1,4-dioxane                    | 301          | -4.2     | -3.3  |
| 44    | 11       | <i>i</i> PrOH                  | 301          | -4.7     | -3.1  |
| 45    | 11       | MeOH                           | 301          | -5.8     | -3.8  |
| 46    | 12       | C <sub>6</sub> H <sub>12</sub> | 301          | -4.7     | -4.1  |
| 47    | 12       | C <sub>6</sub> H <sub>6</sub>  | 301          | -5.0     | -4.5  |
| 48    | 12       | 1,4-dioxane                    | 301          | -5.0     | -3.9  |
| 49    | 13       | C <sub>6</sub> H <sub>12</sub> | 348          | -4.7     | -4.5  |
| 50    | 13       | C <sub>6</sub> H <sub>6</sub>  | 348          | -5.1     | -5.1  |
| 51    | 13       | acetone                        | 348          | -6.0     | -5.7  |
| 52    | 14a      | <i>n</i> -hexane               | 303          | -3.0     | -4.5  |
| 53    | 14a      | CHCl <sub>3</sub>              | 303          | -3.8     | -4.4  |
| 54    | 14a      | <i>n</i> PrOH                  | 303          | -4.3     | -2.9  |
| 55    | 14a      | H <sub>2</sub> O               | 303          | -5.9     | -2.8  |
| 56    | 14a      | TFE                            | 303          | -4.4     | -1.7  |
| 57    | 14b      | <i>n</i> -hexane               | 303          | -3.2     | -4.7  |
| 58    | 14b      | <i>n</i> PrOH                  | 303          | -4.5     | -3.2  |
| 59    | 14b      | TFE                            | 303          | -4.6     | -2.1  |
| 60    | 14b      | H <sub>2</sub> O               | 303          | -6.3     | -3.3  |
| 61    | 15       | THF                            | 308          | -5.3     | -5.7  |

Table S6: Computed solution-phase reaction/activation entropies given as the difference to experimental values. All entropies are given as  $-TS$  in kcal/mol at the given temperature.

| Entry | Reaction | Solvent                       | $T / K$ | $-T(\Delta_r S_{\text{comp}} - \Delta_r S_{\text{exp}})$ | exp error |
|-------|----------|-------------------------------|---------|----------------------------------------------------------|-----------|
| 9     | 7a       | DCM                           | 270     | 3.3                                                      | —         |
| 10    | 7b       | C <sub>6</sub> H <sub>6</sub> | 314     | 4.0                                                      | 0.4       |
| 11    | 8a       | CCl <sub>4</sub>              | 298     | 4.1                                                      | 0.4       |
| 12    | 8b       | CCl <sub>4</sub>              | 298     | 3.2                                                      | 0.2       |
| 13    | 8c       | CCl <sub>4</sub>              | 298     | 1.4                                                      | 0.1       |
| 14    | 8d       | CCl <sub>4</sub>              | 298     | 2.9                                                      | 0.1       |
| 15    | 8e       | CCl <sub>4</sub>              | 298     | 3.1                                                      | 0.1       |
| 16    | 8f       | CCl <sub>4</sub>              | 298     | 2.3                                                      | 0.1       |
| 17    | 8g       | CCl <sub>4</sub>              | 298     | 2.5                                                      | 0.4       |
| 18    | 8h       | CCl <sub>4</sub>              | 298     | 1.8                                                      | 0.1       |
| 19    | 8i       | CCl <sub>4</sub>              | 298     | 1.7                                                      | 0.2       |
| 20    | 8j       | CCl <sub>4</sub>              | 298     | 2.2                                                      | 0.2       |
| 21    | 8k       | CCl <sub>4</sub>              | 298     | 1.8                                                      | 0.1       |
| 22    | 8l       | CCl <sub>4</sub>              | 298     | 0.8                                                      | 0.1       |
| 23    | 8m       | CCl <sub>4</sub>              | 298     | 0.4                                                      | 0.1       |
| 24    | 8n       | CCl <sub>4</sub>              | 298     | 3.6                                                      | 0.1       |
| 25    | 8o       | CCl <sub>4</sub>              | 298     | 4.4                                                      | 0.3       |
| 26    | 8p       | CCl <sub>4</sub>              | 298     | 1.8                                                      | 0.1       |
| 27    | 8q       | CCl <sub>4</sub>              | 298     | 1.9                                                      | 0.1       |
| 28    | 8r       | CCl <sub>4</sub>              | 298     | 2.6                                                      | 0.1       |
| 29    | 8s       | CCl <sub>4</sub>              | 298     | 3.5                                                      | 0.1       |
| 30    | 8t       | CCl <sub>4</sub>              | 298     | 4.1                                                      | 0.1       |
| 31    | 8u       | CCl <sub>4</sub>              | 298     | 3.6                                                      | 0.4       |
| 32    | 8v       | CCl <sub>4</sub>              | 298     | 1.4                                                      | 0.3       |
| 33    | 8w       | CCl <sub>4</sub>              | 298     | 1.0                                                      | 0.2       |
| 34    | 8x       | CCl <sub>4</sub>              | 298     | 2.5                                                      | 0.1       |
| 35    | 8y       | CCl <sub>4</sub>              | 298     | 2.1                                                      | 0.1       |
| 36    | 8z       | CCl <sub>4</sub>              | 298     | 0.5                                                      | 0.2       |
| 37    | 8z       | C <sub>6</sub> H <sub>6</sub> | 298     | 1.2                                                      | 0.2       |

| 2     | Computed | Gibbs                          | Free  | Energies                                                               |           |
|-------|----------|--------------------------------|-------|------------------------------------------------------------------------|-----------|
| 38    | 8z       | C <sub>6</sub> H <sub>12</sub> | 298   | 0.2                                                                    | 0.1       |
| 39    | 9        | diglyme                        | 348   | -0.5                                                                   | 0.6       |
| Entry | Reaction | Solvent                        | T / K | $-T(\Delta^\ddagger S_{\text{comp}} - \Delta^\ddagger S_{\text{exp}})$ | exp error |
| 40    | 10       | CCl <sub>4</sub>               | 301   | 1.5                                                                    | 0.2       |
| 41    | 11       | C <sub>6</sub> H <sub>12</sub> | 301   | 0.1                                                                    | 0.9       |
| 42    | 11       | C <sub>6</sub> H <sub>6</sub>  | 301   | -0.7                                                                   | 0.6       |
| 43    | 11       | 1,4-dioxane                    | 301   | 0.5                                                                    | 0.6       |
| 44    | 11       | <i>i</i> PrOH                  | 301   | -1.2                                                                   | 0.6       |
| 45    | 11       | MeOH                           | 301   | -0.8                                                                   | 0.3       |
| 46    | 12       | C <sub>6</sub> H <sub>12</sub> | 301   | -1.5                                                                   | 0.6       |
| 47    | 12       | C <sub>6</sub> H <sub>6</sub>  | 301   | -2.4                                                                   | 0.5       |
| 48    | 12       | 1,4-dioxane                    | 301   | -2.3                                                                   | 0.5       |
| 49    | 13       | C <sub>6</sub> H <sub>12</sub> | 348   | -2.5                                                                   | 0.5       |
| 50    | 13       | C <sub>6</sub> H <sub>6</sub>  | 348   | -2.9                                                                   | 0.3       |
| 51    | 13       | acetone                        | 348   | -4.0                                                                   | 0.2       |
| 52    | 14a      | <i>n</i> -hexane               | 303   | 1.5                                                                    | 0.5       |
| 53    | 14a      | CHCl <sub>3</sub>              | 303   | 1.9                                                                    | 0.5       |
| 54    | 14a      | <i>n</i> PrOH                  | 303   | 0.2                                                                    | 0.5       |
| 55    | 14a      | H <sub>2</sub> O               | 303   | 0.4                                                                    | 0.5       |
| 56    | 14a      | TFE                            | 303   | -2.8                                                                   | 0.5       |
| 57    | 14b      | <i>n</i> -hexane               | 303   | 0.9                                                                    | 0.2       |
| 58    | 14b      | <i>n</i> PrOH                  | 303   | -0.4                                                                   | 0.2       |
| 59    | 14b      | TFE                            | 303   | -3.2                                                                   | 0.2       |
| 60    | 14b      | H <sub>2</sub> O               | 303   | -0.2                                                                   | 0.2       |
| 61    | 15       | THF                            | 308   | 3.4                                                                    | 2.2       |

## 2.5 Computed Gibbs Free Energies

Table S7: Computed Gibbs free energies (kcal/mol) for unimolecular (entries 1–8) and bimolecular (entries 9–61) reactions. WFT and DHF refer to DLPNO-CCSD(T) and revDSD-PBEP86-D4 level of theory, respectively. Bulk solvation was considered implicitly with the SMD model.

| Entry | Reaction | Solvent                       | T / K | $\Delta_r G_{\text{soln}}$        |      | $\Delta_r G_g$        |      | $\Delta_r \Delta_{\text{solv}} G$        | $\Delta_r E_e$        |
|-------|----------|-------------------------------|-------|-----------------------------------|------|-----------------------|------|------------------------------------------|-----------------------|
|       |          |                               |       | WFT                               | DHF  | WFT                   | DHF  |                                          |                       |
| 1     | 1        | decalin                       | 411   | -0.9                              | -0.9 | -1.1                  | -1.1 | 0.2                                      | 0.2                   |
| Entry | Reaction | Solvent                       | T / K | $\Delta^\ddagger G_{\text{soln}}$ |      | $\Delta^\ddagger G_g$ |      | $\Delta^\ddagger \Delta_{\text{solv}} G$ | $\Delta^\ddagger E_e$ |
|       |          |                               |       | WFT                               | DHF  | WFT                   | DHF  |                                          |                       |
| 2     | 1        | decalin                       | 411   | 34.5                              | 32.6 | 34.2                  | 32.3 | 0.4                                      | 0.1                   |
| 3     | 2        | 1-decene                      | 396   | 29.5                              | 29.9 | 30.4                  | 30.8 | -0.9                                     | -0.1                  |
| 4     | 2        | PhCN                          | 383   | 29.1                              | 27.2 | 30.4                  | 28.4 | -1.3                                     | -0.1                  |
| 5     | 3        | <i>n</i> -hexane              | 303   | 19.4                              | 18.4 | 19.4                  | 18.4 | 0.0                                      | 0.5                   |
| 6     | 4        | C <sub>6</sub> H <sub>6</sub> | 340   | 31.9                              | 28.9 | 32.5                  | 29.5 | -0.6                                     | -0.9                  |
| 7     | 5        | C <sub>6</sub> H <sub>6</sub> | 337   | 31.0                              | 28.3 | 31.4                  | 28.7 | -0.4                                     | -0.9                  |
| 8     | 6        | CHCl <sub>3</sub>             | 329   | 21.0                              | 21.1 | 20.2                  | 20.4 | 0.8                                      | 0.3                   |
| Entry | Reaction | Solvent                       | T / K | $\Delta_r G_{\text{soln}}$        |      | $\Delta_r G_g$        |      | $\Delta_r \Delta_{\text{solv}} G$        | $\Delta_r E_e$        |
|       |          |                               |       | WFT                               | DHF  | WFT                   | DHF  |                                          |                       |
| 9     | 7a       | DCM                           | 270   | -1.1                              | -1.5 | -8.3                  | -8.8 | 7.2                                      | 9.1                   |
| 10    | 7b       | C <sub>6</sub> H <sub>6</sub> | 314   | -0.5                              | -1.1 | -3.9                  | -4.5 | 3.4                                      | 5.0                   |
| 11    | 8a       | CCl <sub>4</sub>              | 298   | 4.8                               | 5.2  | 4.9                   | 5.2  | 0.0                                      | 1.2                   |

| 2  | Computed |                  |     | Gibbs |      | Free |      | Energies |     |
|----|----------|------------------|-----|-------|------|------|------|----------|-----|
| 12 | 8b       | CCl <sub>4</sub> | 298 | 4.6   | 4.6  | 4.8  | 4.8  | -0.2     | 1.0 |
| 13 | 8c       | CCl <sub>4</sub> | 298 | 2.1   | 2.1  | 2.7  | 2.6  | -0.5     | 0.8 |
| 14 | 8d       | CCl <sub>4</sub> | 298 | 4.2   | 3.9  | 3.9  | 3.7  | 0.2      | 1.4 |
| 15 | 8e       | CCl <sub>4</sub> | 298 | 4.0   | 3.6  | 4.3  | 3.9  | -0.3     | 1.0 |
| 16 | 8f       | CCl <sub>4</sub> | 298 | 1.9   | 1.8  | 3.5  | 3.4  | -1.5     | 0.1 |
| 17 | 8g       | CCl <sub>4</sub> | 298 | 3.9   | 3.5  | 3.7  | 3.3  | 0.2      | 1.4 |
| 18 | 8h       | CCl <sub>4</sub> | 298 | 1.7   | 1.5  | 2.5  | 2.3  | -0.8     | 0.7 |
| 19 | 8i       | CCl <sub>4</sub> | 298 | 2.0   | 1.7  | 3.4  | 3.0  | -1.4     | 0.9 |
| 20 | 8j       | CCl <sub>4</sub> | 298 | 3.3   | 3.4  | 3.0  | 3.0  | 0.3      | 1.3 |
| 21 | 8k       | CCl <sub>4</sub> | 298 | 1.4   | 1.1  | 2.1  | 1.8  | -0.7     | 1.3 |
| 22 | 8l       | CCl <sub>4</sub> | 298 | 0.1   | -0.3 | 1.5  | 1.1  | -1.4     | 1.0 |
| 23 | 8m       | CCl <sub>4</sub> | 298 | 0.6   | 0.9  | 1.2  | 1.4  | -0.5     | 0.7 |
| 24 | 8n       | CCl <sub>4</sub> | 298 | 0.9   | 0.7  | 1.3  | 1.1  | -0.4     | 0.8 |
| 25 | 8o       | CCl <sub>4</sub> | 298 | 2.1   | 3.2  | 0.8  | 1.9  | 1.3      | 1.8 |
| 26 | 8p       | CCl <sub>4</sub> | 298 | 0.7   | 0.2  | 2.0  | 1.5  | -1.3     | 1.0 |
| 27 | 8q       | CCl <sub>4</sub> | 298 | 0.8   | 0.5  | 1.7  | 1.4  | -0.9     | 0.6 |
| 28 | 8r       | CCl <sub>4</sub> | 298 | 1.6   | 1.2  | 2.0  | 1.6  | -0.3     | 0.9 |
| 29 | 8s       | CCl <sub>4</sub> | 298 | 0.8   | 0.8  | 0.7  | 0.7  | 0.1      | 1.4 |
| 30 | 8t       | CCl <sub>4</sub> | 298 | 0.3   | 1.4  | -1.3 | -0.2 | 1.6      | 2.3 |
| 31 | 8u       | CCl <sub>4</sub> | 298 | -2.7  | -2.2 | -3.4 | -2.8 | 0.7      | 2.1 |



| 2  | Computed |                                |     | Gibbs |      | Free |     | Energies |     |
|----|----------|--------------------------------|-----|-------|------|------|-----|----------|-----|
| 32 | 8v       | CCl <sub>4</sub>               | 298 | 1.9   | 1.7  | 3.0  | 2.8 | -1.1     | 0.7 |
| 33 | 8w       | CCl <sub>4</sub>               | 298 | 1.3   | 0.9  | 2.2  | 1.8 | -0.9     | 0.6 |
| 34 | 8x       | CCl <sub>4</sub>               | 298 | 3.9   | 3.5  | 4.3  | 3.9 | -0.4     | 0.9 |
| 35 | 8y       | CCl <sub>4</sub>               | 298 | 1.9   | 1.7  | 2.7  | 2.4 | -0.8     | 0.7 |
| 36 | 8z       | CCl <sub>4</sub>               | 298 | 0.3   | -0.1 | 1.8  | 1.4 | -1.5     | 0.8 |
| 37 | 8z       | C <sub>6</sub> H <sub>6</sub>  | 298 | 0.3   | -0.1 | 1.8  | 1.4 | -1.5     | 0.8 |
| 38 | 8z       | C <sub>6</sub> H <sub>12</sub> | 298 | 0.2   | -0.3 | 1.8  | 1.4 | -1.7     | 0.7 |
| 39 | 9        | diglyme                        | 348 | 16.3  | 14.6 | 3.7  | 2.0 | 12.6     | 9.1 |

| Entry | Reaction | Solvent                        | T / K | $\Delta^\ddagger G_{\text{soln}}$ |      | $\Delta^\ddagger G_{\text{g}}$ |      | $\Delta^\ddagger \Delta_{\text{soln}} G$ | $\Delta^\ddagger E_{\text{e}}$ |
|-------|----------|--------------------------------|-------|-----------------------------------|------|--------------------------------|------|------------------------------------------|--------------------------------|
|       |          |                                |       | WFT                               | DHF  | WFT                            | DHF  |                                          |                                |
| 40    | 10       | CCl <sub>4</sub>               | 301   | 30.2                              | 28.3 | 29.4                           | 27.5 | 0.7                                      | 1.2                            |
| 41    | 11       | C <sub>6</sub> H <sub>12</sub> | 301   | 24.9                              | 22.1 | 26.3                           | 23.5 | -1.4                                     | 0.6                            |
| 42    | 11       | C <sub>6</sub> H <sub>6</sub>  | 301   | 25.0                              | 22.2 | 26.3                           | 23.5 | -1.3                                     | 0.6                            |
| 43    | 11       | 1,4-dioxane                    | 301   | 23.9                              | 21.1 | 26.3                           | 23.5 | -2.4                                     | 0.6                            |
| 44    | 11       | <i>i</i> PrOH                  | 301   | 23.2                              | 20.4 | 26.3                           | 23.5 | -3.1                                     | 0.6                            |
| 45    | 11       | MeOH                           | 301   | 22.5                              | 19.7 | 26.3                           | 23.5 | -3.8                                     | 0.3                            |
| 46    | 12       | C <sub>6</sub> H <sub>12</sub> | 301   | 26.5                              | 23.7 | 29.9                           | 27.1 | -3.4                                     | -0.6                           |
| 47    | 12       | C <sub>6</sub> H <sub>6</sub>  | 301   | 26.6                              | 23.8 | 29.9                           | 27.1 | -3.3                                     | -0.7                           |
| 48    | 12       | 1,4-dioxane                    | 301   | 26.0                              | 23.2 | 29.9                           | 27.1 | -3.9                                     | -0.7                           |
| 49    | 13       | C <sub>6</sub> H <sub>12</sub> | 348   | 34.6                              | 31.1 | 37.2                           | 33.8 | -2.6                                     | -0.2                           |

| 2  | Computed |                               |     | Gibbs |      | Free |      | Energies |      |
|----|----------|-------------------------------|-----|-------|------|------|------|----------|------|
| 50 | 13       | C <sub>6</sub> H <sub>6</sub> | 348 | 34.8  | 31.3 | 37.2 | 33.8 | -2.4     | -0.2 |
| 51 | 13       | acetone                       | 348 | 34.1  | 30.6 | 37.2 | 33.8 | -3.1     | -0.6 |
| 52 | 14a      | <i>n</i> -hexane              | 303 | 22.9  | 21.4 | 22.3 | 20.7 | 0.6      | 1.1  |
| 53 | 14a      | CHCl <sub>3</sub>             | 303 | 23.0  | 21.5 | 22.3 | 20.7 | 0.7      | 2.1  |
| 54 | 14a      | <i>n</i> PrOH                 | 303 | 22.2  | 20.6 | 22.3 | 20.7 | -0.1     | 3.2  |
| 55 | 14a      | H <sub>2</sub> O              | 303 | 20.8  | 19.3 | 22.3 | 20.7 | -1.4     | 3.6  |
| 56 | 14a      | TFE                           | 303 | 21.2  | 19.6 | 22.3 | 20.7 | -1.1     | 3.5  |
| 57 | 14b      | <i>n</i> -hexane              | 303 | 22.6  | 21.1 | 22.0 | 20.5 | 0.6      | 1.1  |
| 58 | 14b      | <i>n</i> PrOH                 | 303 | 22.0  | 20.5 | 22.0 | 20.5 | 0.0      | 3.2  |
| 59 | 14b      | TFE                           | 303 | 21.0  | 19.5 | 22.0 | 20.5 | -1.0     | 3.5  |
| 60 | 14b      | H <sub>2</sub> O              | 303 | 20.7  | 19.2 | 22.0 | 20.5 | -1.3     | 3.6  |
| 61 | 15       | THF                           | 308 | 28.1  | 29.8 | 27.7 | 29.4 | 0.4      | 2.2  |

## 2.6 Computed Entropies

Table S8: Computed entropies for unimolecular (entries 1–8) and bimolecular (entries 9–61) reactions. All entropies are given as  $-TS$  in kcal/mol at the given temperature.

| Entry | Reaction | Solvent                       | $T / K$ | $\Delta_r S_{\text{soln}}$ | $\Delta_r \Delta_{\text{solv}} S$ | $\Delta_r S_{\text{g,trans}}$ | $\Delta_r S_{\text{g,rot}}$ | $\Delta_r S_{\text{g,vib}}$ | $\Delta_r \Delta_{\text{solv}} S_{\text{trans}}$ | $\Delta_r \Delta_{\text{solv}} S_{\text{rot}}$ | $\Delta_r S_{\text{cav}}$ | $\Delta_r \Delta S_{\text{conc}}$ | $\Delta_r V_{\text{vdW}}$ |
|-------|----------|-------------------------------|---------|----------------------------|-----------------------------------|-------------------------------|-----------------------------|-----------------------------|--------------------------------------------------|------------------------------------------------|---------------------------|-----------------------------------|---------------------------|
| 1     | 1        | decalin                       | 411     | 0.1                        | 0.0                               | 0.0                           | 0.0                         | 0.1                         | 0.0                                              | 0.0                                            | 0.0                       | 0.0                               | -0.1                      |
| 2     | 1        | decalin                       | 411     | 0.3                        | 0.0                               | 0.0                           | 0.0                         | 0.3                         | 0.0                                              | 0.0                                            | 0.0                       | 0.0                               | 0.0                       |
| 3     | 2        | 1-decene                      | 396     | 1.3                        | 0.0                               | 0.0                           | 0.1                         | 1.3                         | 0.0                                              | 0.0                                            | 0.0                       | 0.0                               | -1.1                      |
| 4     | 2        | PhCN                          | 383     | 1.3                        | -0.1                              | 0.0                           | 0.1                         | 1.3                         | 0.0                                              | 0.0                                            | 0.0                       | 0.0                               | -1.1                      |
| 5     | 3        | <i>n</i> -hexane              | 303     | 2.4                        | -0.5                              | 0.0                           | 0.1                         | 2.7                         | 0.0                                              | -0.5                                           | 0.0                       | 0.0                               | -2.1                      |
| 6     | 4        | C <sub>6</sub> H <sub>6</sub> | 340     | -1.0                       | 0.0                               | 0.0                           | 0.0                         | -0.9                        | 0.0                                              | 0.0                                            | 0.0                       | 0.0                               | 3.9                       |
| 7     | 5        | C <sub>6</sub> H <sub>6</sub> | 337     | -0.6                       | -0.1                              | 0.0                           | 0.0                         | -0.6                        | 0.0                                              | -0.1                                           | 0.0                       | 0.0                               | 3.9                       |
| 8     | 6        | CHCl <sub>3</sub>             | 329     | -0.1                       | 0.0                               | 0.0                           | 0.0                         | -0.1                        | 0.0                                              | 0.0                                            | 0.0                       | 0.0                               | 4.2                       |
| 9     | 7a       | DCM                           | 270     | 6.5                        | -4.9                              | 10.0                          | 6.1                         | -4.7                        | -2.5                                             | -0.1                                           | -0.6                      | -1.7                              | 0.0                       |
| 10    | 7b       | C <sub>6</sub> H <sub>6</sub> | 314     | 8.1                        | -5.3                              | 12.0                          | 8.0                         | -6.6                        | -2.9                                             | -0.2                                           | -0.2                      | -2.0                              | 0.0                       |
| 11    | 8a       | CCl <sub>4</sub>              | 298     | 5.7                        | -5.3                              | 11.5                          | 6.8                         | -7.3                        | -2.6                                             | -0.6                                           | -0.2                      | -1.9                              | 0.0                       |
| 12    | 8b       | CCl <sub>4</sub>              | 298     | 5.9                        | -5.2                              | 11.3                          | 6.7                         | -7.0                        | -2.6                                             | -0.4                                           | -0.2                      | -1.9                              | 0.0                       |
| 13    | 8c       | CCl <sub>4</sub>              | 298     | 5.6                        | -5.3                              | 11.1                          | 6.0                         | -6.2                        | -2.7                                             | -0.5                                           | -0.2                      | -1.9                              | 0.0                       |
| 14    | 8d       | CCl <sub>4</sub>              | 298     | 6.2                        | -5.3                              | 11.2                          | 6.6                         | -6.4                        | -2.7                                             | -0.5                                           | -0.2                      | -1.9                              | 0.0                       |
| 15    | 8e       | CCl <sub>4</sub>              | 298     | 6.7                        | -4.9                              | 11.1                          | 6.3                         | -5.8                        | -2.7                                             | -0.1                                           | -0.2                      | -1.9                              | 0.0                       |

| 2  |    | Computed         |     |     | Gibbs |      |     | Free |      |      | Energies |      |     |
|----|----|------------------|-----|-----|-------|------|-----|------|------|------|----------|------|-----|
| 16 | 8f | CCl <sub>4</sub> | 298 | 6.4 | -5.1  | 11.3 | 6.8 | -6.6 | -2.6 | -0.3 | -0.2     | -1.9 | 0.3 |
| 17 | 8g | CCl <sub>4</sub> | 298 | 6.4 | -5.1  | 11.5 | 6.8 | -6.8 | -2.6 | -0.4 | -0.2     | -1.9 | 0.3 |
| 18 | 8h | CCl <sub>4</sub> | 298 | 5.7 | -4.7  | 11.1 | 5.8 | -6.4 | -2.6 | 0.0  | -0.2     | -1.9 | 0.3 |
| 19 | 8i | CCl <sub>4</sub> | 298 | 6.1 | -5.0  | 11.5 | 6.6 | -6.9 | -2.7 | -0.3 | -0.2     | -1.9 | 0.3 |
| 20 | 8j | CCl <sub>4</sub> | 298 | 6.2 | -5.2  | 11.3 | 6.7 | -6.6 | -2.7 | -0.4 | -0.2     | -1.9 | 0.3 |
| 21 | 8k | CCl <sub>4</sub> | 298 | 6.6 | -5.1  | 11.4 | 6.8 | -6.6 | -2.6 | -0.4 | -0.2     | -1.9 | 0.3 |
| 22 | 8l | CCl <sub>4</sub> | 298 | 5.3 | -4.9  | 11.2 | 5.9 | -6.9 | -2.7 | -0.1 | -0.2     | -1.9 | 0.3 |
| 23 | 8m | CCl <sub>4</sub> | 298 | 6.7 | -5.2  | 11.3 | 6.3 | -5.6 | -2.6 | -0.5 | -0.2     | -1.9 | 0.4 |
| 24 | 8n | CCl <sub>4</sub> | 298 | 6.4 | -4.9  | 11.0 | 5.9 | -5.6 | -2.4 | -0.4 | -0.2     | -1.9 | 0.3 |
| 25 | 8o | CCl <sub>4</sub> | 298 | 7.9 | -5.5  | 11.6 | 7.5 | -5.7 | -2.6 | -0.8 | -0.2     | -1.9 | 0.4 |
| 26 | 8p | CCl <sub>4</sub> | 298 | 6.3 | -4.8  | 11.2 | 6.5 | -6.7 | -2.7 | 0.0  | -0.2     | -1.9 | 0.3 |
| 27 | 8q | CCl <sub>4</sub> | 298 | 5.7 | -4.4  | 11.1 | 6.3 | -7.3 | -2.6 | 0.3  | -0.2     | -1.9 | 0.4 |
| 28 | 8r | CCl <sub>4</sub> | 298 | 6.7 | -4.9  | 11.2 | 6.5 | -6.1 | -2.7 | -0.1 | -0.2     | -1.9 | 0.4 |
| 29 | 8s | CCl <sub>4</sub> | 298 | 6.8 | -5.1  | 11.2 | 6.3 | -5.5 | -2.6 | -0.5 | -0.2     | -1.9 | 0.4 |
| 30 | 8t | CCl <sub>4</sub> | 298 | 7.1 | -5.5  | 11.6 | 7.1 | -6.1 | -2.6 | -0.8 | -0.2     | -1.9 | 0.3 |
| 31 | 8u | CCl <sub>4</sub> | 298 | 6.7 | -5.3  | 11.5 | 6.6 | -6.0 | -2.6 | -0.6 | -0.2     | -1.9 | 0.4 |
| 32 | 8v | CCl <sub>4</sub> | 298 | 6.7 | -4.8  | 11.0 | 6.0 | -5.5 | -2.5 | -0.3 | -0.2     | -1.9 | 0.3 |
| 33 | 8w | CCl <sub>4</sub> | 298 | 4.9 | -4.8  | 11.0 | 5.7 | -6.6 | -2.6 | -0.1 | -0.2     | -1.9 | 0.3 |
| 34 | 8x | CCl <sub>4</sub> | 298 | 6.3 | -4.9  | 11.0 | 6.2 | -6.0 | -2.7 | -0.2 | -0.2     | -1.9 | 0.3 |
| 35 | 8y | CCl <sub>4</sub> | 298 | 6.1 | -4.8  | 11.1 | 6.2 | -6.3 | -2.6 | -0.1 | -0.2     | -1.9 | 0.3 |

| 2     |          | Computed                       |       |                                   | Gibbs                                    |                                      |                                    |                                    | Free                                                    |                                                       |                                  | Energies                                 |                                  |  |
|-------|----------|--------------------------------|-------|-----------------------------------|------------------------------------------|--------------------------------------|------------------------------------|------------------------------------|---------------------------------------------------------|-------------------------------------------------------|----------------------------------|------------------------------------------|----------------------------------|--|
| Entry | Reaction | Solvent                        | T / K | $\Delta^\ddagger S_{\text{soln}}$ | $\Delta^\ddagger \Delta_{\text{soln}} S$ | $\Delta^\ddagger S_{\text{g,trans}}$ | $\Delta^\ddagger S_{\text{g,rot}}$ | $\Delta^\ddagger S_{\text{g,vib}}$ | $\Delta^\ddagger \Delta_{\text{soln}} S_{\text{trans}}$ | $\Delta^\ddagger \Delta_{\text{soln}} S_{\text{rot}}$ | $\Delta^\ddagger S_{\text{cav}}$ | $\Delta^\ddagger \Delta S_{\text{conc}}$ | $\Delta^\ddagger V_{\text{vdW}}$ |  |
| 36    | 8z       | CCl <sub>4</sub>               | 298   | 5.2                               | -4.9                                     | 11.1                                 | 5.7                                | -6.8                               | -2.7                                                    | -0.1                                                  | -0.2                             | -1.9                                     | 0.3                              |  |
| 37    | 8z       | C <sub>6</sub> H <sub>6</sub>  | 298   | 5.1                               | -4.9                                     | 11.1                                 | 5.7                                | -6.8                               | -2.7                                                    | -0.1                                                  | -0.2                             | -1.9                                     | 0.3                              |  |
| 38    | 8z       | C <sub>6</sub> H <sub>12</sub> | 298   | 5.5                               | -4.6                                     | 11.1                                 | 5.7                                | -6.8                               | -2.4                                                    | -0.1                                                  | -0.2                             | -1.9                                     | 0.3                              |  |
| 39    | 9        | diglyme                        | 348   | 10.1                              | -7.1                                     | 14.0                                 | 8.6                                | -5.4                               | -2.9                                                    | -1.1                                                  | -0.7                             | -2.3                                     | 2.8                              |  |
| 40    | 10       | CCl <sub>4</sub>               | 301   | 8.4                               | -5.3                                     | 11.0                                 | 5.7                                | -2.9                               | -2.5                                                    | -0.6                                                  | -0.2                             | -1.9                                     | -6.1                             |  |
| 41    | 11       | C <sub>6</sub> H <sub>12</sub> | 301   | 10.3                              | -6.1                                     | 12.9                                 | 7.6                                | -4.1                               | -2.9                                                    | -0.8                                                  | -0.2                             | -2.2                                     | -5.1                             |  |
| 42    | 11       | C <sub>6</sub> H <sub>6</sub>  | 301   | 10.1                              | -6.3                                     | 12.9                                 | 7.6                                | -4.1                               | -3.0                                                    | -0.8                                                  | -0.3                             | -2.2                                     | -5.1                             |  |
| 43    | 11       | 1,4-dioxane                    | 301   | 10.1                              | -6.3                                     | 12.9                                 | 7.6                                | -4.1                               | -3.1                                                    | -0.8                                                  | -0.3                             | -2.2                                     | -5.1                             |  |
| 44    | 11       | <i>i</i> PrOH                  | 301   | 9.6                               | -6.8                                     | 12.9                                 | 7.6                                | -4.1                               | -3.0                                                    | -0.8                                                  | -0.9                             | -2.2                                     | -5.1                             |  |
| 45    | 11       | MeOH                           | 301   | 8.5                               | -7.9                                     | 12.9                                 | 7.6                                | -4.1                               | -3.3                                                    | -1.0                                                  | -1.5                             | -2.2                                     | -5.1                             |  |
| 46    | 12       | C <sub>6</sub> H <sub>12</sub> | 301   | 10.5                              | -6.9                                     | 12.9                                 | 7.9                                | -3.4                               | -2.9                                                    | -1.6                                                  | -0.2                             | -2.2                                     | -5.1                             |  |
| 47    | 12       | C <sub>6</sub> H <sub>6</sub>  | 301   | 10.3                              | -7.1                                     | 12.9                                 | 7.9                                | -3.4                               | -3.0                                                    | -1.7                                                  | -0.3                             | -2.2                                     | -5.1                             |  |
| 48    | 12       | 1,4-dioxane                    | 301   | 10.2                              | -7.2                                     | 12.9                                 | 7.9                                | -3.4                               | -3.0                                                    | -1.7                                                  | -0.3                             | -2.2                                     | -5.1                             |  |
| 49    | 13       | C <sub>6</sub> H <sub>12</sub> | 348   | 12.1                              | -7.0                                     | 13.1                                 | 8.3                                | -2.3                               | -2.9                                                    | -1.6                                                  | -0.2                             | -2.3                                     | -5.1                             |  |
| 50    | 13       | C <sub>6</sub> H <sub>6</sub>  | 348   | 11.7                              | -7.4                                     | 13.1                                 | 8.3                                | -2.3                               | -3.1                                                    | -1.7                                                  | -0.3                             | -2.3                                     | -5.1                             |  |
| 51    | 13       | acetone                        | 348   | 10.8                              | -8.3                                     | 13.1                                 | 8.3                                | -2.3                               | -3.2                                                    | -1.7                                                  | -1.1                             | -2.3                                     | -5.1                             |  |
| 52    | 14a      | <i>n</i> -hexane               | 303   | 9.5                               | -4.9                                     | 11.6                                 | 7.0                                | -4.2                               | -2.3                                                    | -0.5                                                  | -0.2                             | -1.9                                     | -5.1                             |  |
| 53    | 14a      | CHCl <sub>3</sub>              | 303   | 8.6                               | -5.8                                     | 11.6                                 | 7.0                                | -4.2                               | -2.7                                                    | -0.6                                                  | -0.5                             | -1.9                                     | -5.1                             |  |
| 54    | 14a      | <i>n</i> PrOH                  | 303   | 8.2                               | -6.2                                     | 11.6                                 | 7.0                                | -4.2                               | -2.7                                                    | -0.6                                                  | -1.0                             | -1.9                                     | -5.1                             |  |

| 2  |     | Computed         |     |      | Gibbs |      |     | Free |      |      | Energies |      |    |
|----|-----|------------------|-----|------|-------|------|-----|------|------|------|----------|------|----|
| 55 | 14a | H <sub>2</sub> O | 303 | 6.5  | -7.9  | 11.6 | 7.0 | -4.2 | -3.2 | -0.7 | -2.0     | -1.9 | -5 |
| 56 | 14a | TFE              | 303 | 8.1  | -6.3  | 11.6 | 7.0 | -4.2 | -2.8 | -0.6 | -1.0     | -1.9 | -5 |
| 57 | 14b | <i>n</i> -hexane | 303 | 9.2  | -5.2  | 11.7 | 7.2 | -4.5 | -2.4 | -0.7 | -0.2     | -1.9 | -5 |
| 58 | 14b | <i>n</i> PrOH    | 303 | 8.0  | -6.4  | 11.7 | 7.2 | -4.5 | -2.7 | -0.8 | -1.0     | -1.9 | -5 |
| 59 | 14b | TFE              | 303 | 7.9  | -6.5  | 11.7 | 7.2 | -4.5 | -2.7 | -0.8 | -1.1     | -1.9 | -5 |
| 60 | 14b | H <sub>2</sub> O | 303 | 6.2  | -8.2  | 11.7 | 7.2 | -4.5 | -3.1 | -1.0 | -2.1     | -1.9 | -5 |
| 61 | 15  | THF              | 308 | 10.1 | -7.5  | 13.4 | 8.7 | -4.5 | -2.9 | -1.5 | -0.9     | -2.2 | -8 |

### 3 Black-Box Algorithm for Solvation Entropy

The algorithm consists of four different bash-scripts. The main script is *calcEntropySolv* that is invoked by the user. The remaining scripts are then invoked internally throughout the calculation and do not require manipulation by the user.

*calcEntropySolv* calculates the solvation entropy of a given solute in the desired solvent (*vide infra* for numerical examples).

*readSolventLibrary* extracts the required physical data from a desired solvent from the solvent library.

*convertPTE* converts the element symbol into its physical quantities (e.g. standard atomic weight).

*calcVolume\_vdW* calculates the molecular vdW volume using Petitjean's algorithm (*vide infra*).<sup>2</sup> The binary must be stored in the same directory.

This section is divided as follows. First, we outline the general procedure of the black-box algorithm. Then, we give detailed information about the calculation of the molecular volume and initial test calculations. Finally, we conclude with the deposited databases and numerical examples for reproduction/documentation purposes.

#### 3.1 General Procedure: Flow-Chart

The flow chart illustrates the single steps of our script for the computation of  $S^{\circ}_{\text{solv}}$  and  $\Delta_{\text{solv}}S^{\circ}$  for any solute (Figure S3). It is mandatory to request a solvent and to provide an input file. This can be either a XYZ file or an output file from a preceding frequency computation (Gaussian/ORCA). Either way the required properties of the solute, i.e., molar mass, the radius of gyration, and van der Waals volume, are calculated. The solvent can be requested either by selecting one of the 187 implemented ones or specified manually. The latter requires the relative permittivity, molar mass, density, and molecular volume of the solvent. Subsequently, the properties of the solute and the solvent are used to calculate the solvation entropy  $\Delta_{\text{solv}}S^{\circ}$ , and its components, according to Garza's formalism.<sup>1</sup> If the input file contains a frequency computation, the gas-phase rotational entropy is read and the gas-phase vibrational entropy is calculated according to Grimme's qRRHO approach (100 cm<sup>-1</sup> cutoff compatible with ORCA).<sup>3</sup> This allows calculating the solution-phase entropy  $S^{\circ}_{\text{solv}}$ .

To summarize, it requires no more than an optimized molecular structure to compute the solvation entropy  $\Delta_{\text{solv}}S^\circ$ . If a frequency computation is present, the solution-phase entropy  $S^\circ_{\text{soln}}$  is additionally calculated.

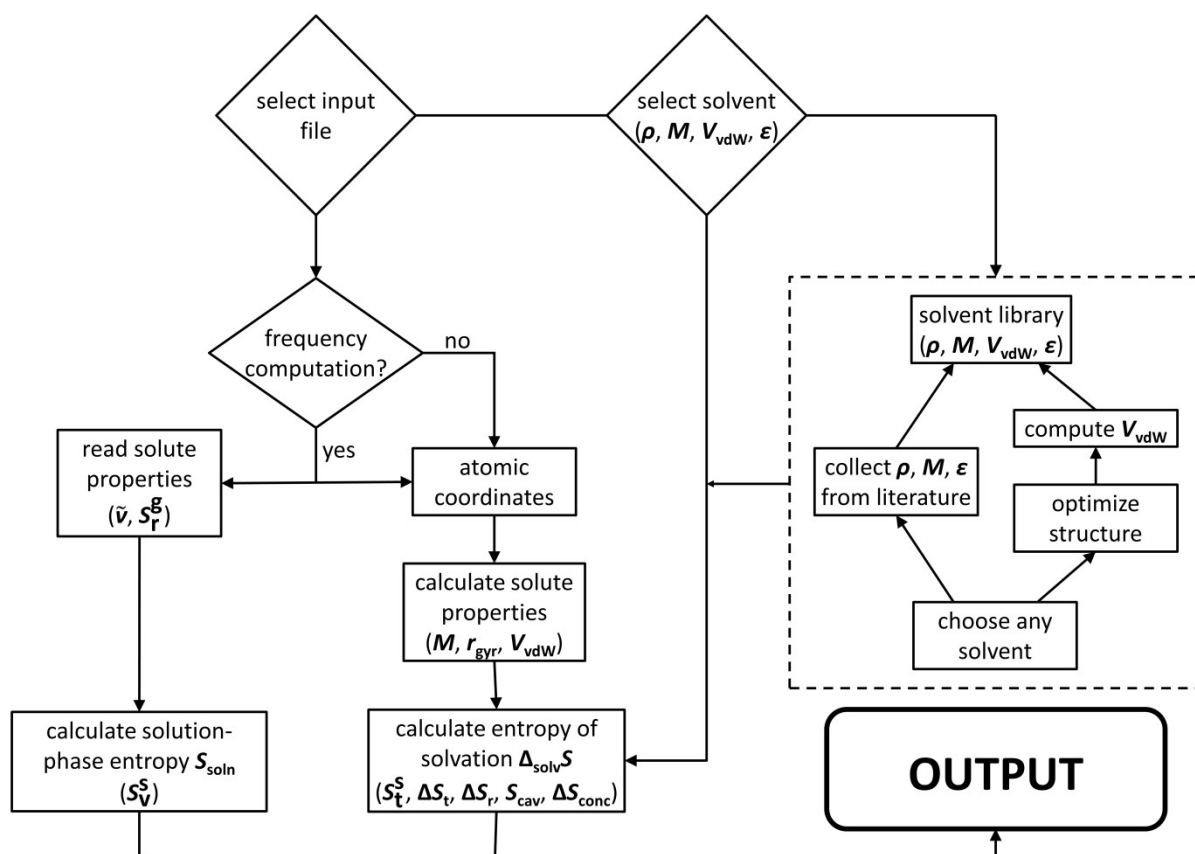

Figure S3. Flowchart illustrating the black-box algorithm to compute  $\Delta_{\text{solv}}S^\circ$  and  $S^\circ_{\text{soln}}$ .

### 3.2 Benchmark of Molecular Volume

The method by Petitjean offers two important tools EPSTAB (=0 by default) and NPERM (=0 by default) to avoid numerical instabilities.<sup>2</sup> The former randomly perturbs the atomic coordinates and the latter performs redundant runs with randomly rotated and renumbered copies of the molecule. Especially the EPSTAB keyword is crucial to avoid artifacts. For iodobenzene we obtained different volumes with deviations  $>1 \text{ \AA}^3$  from redundant runs (NPERM $>1$ ). Increasing EPSTAB eliminates the numerical instabilities at the cost of increased numerical noise. Tests showed that EPSTAB= $5 \cdot 10^{-5}$  is a good compromise as it did not produce any artifacts for any solvent molecule. To counteract the numerical noise, we employ redundant runs and discard potential outliers, i.e., deviations greater than  $0.01 \text{ \AA}^3$  from the



median. The final molecular volume is the arithmetic mean of the remainder. We found that NPERM=7 offers a good compromise between robustness and speed. All in all the computed molecular volume is converged to  $10^{-4} \text{ \AA}^3$ .

### 3.3 Database

For the calculation of the vdW volume of the solute and solvent, we used the appropriate radii from Bondi with the additions from Rowland and Taylor, and Truhlar (Table S9). Any comparable radii should be feasible as long as they are used consistently.

Table S9: Bondi's set of atomic van der Waals radii for main group elements with additions from Rowland and Taylor, and Truhlar.<sup>4-6</sup>

| <b>1</b>   | <b>2</b>   | <b>13</b>  | <b>14</b>  | <b>15</b>  | <b>16</b>  | <b>17</b>  | <b>18</b>  |
|------------|------------|------------|------------|------------|------------|------------|------------|
| H<br>1.10  |            |            |            |            |            |            | He<br>1.40 |
| Li<br>1.82 | Be<br>1.53 | B<br>1.92  | C<br>1.70  | N<br>1.55  | O<br>1.52  | F<br>1.47  | Ne<br>1.54 |
| Na<br>2.27 | Mg<br>1.73 | Al<br>1.84 | Si<br>2.10 | P<br>1.80  | S<br>1.80  | Cl<br>1.75 | Ar<br>1.88 |
| K<br>2.75  | Ca<br>2.31 | Ga<br>1.87 | Ge<br>2.11 | As<br>1.85 | Se<br>1.90 | Br<br>1.85 | Kr<br>2.02 |
| Rb<br>3.03 | Sr<br>2.49 | In<br>1.93 | Sn<br>2.17 | Sb<br>2.06 | Te<br>2.06 | I<br>1.98  | Xe<br>2.16 |
| Cs<br>3.43 | Ba<br>2.68 | Tl<br>1.96 | Pb<br>2.02 | Bi<br>2.07 | Po<br>1.97 | At<br>2.02 | Rn<br>2.20 |
| Fr<br>3.48 | Ra<br>2.83 |            |            |            |            |            |            |

The solvent library requires four parameters which are the relative permittivity, molar mass, density, and molecular volume. All but the latter were collected from the literature. The vdW volume was computed analytically from molecular structures, optimized at PBEh-3c level of theory, using Petitjean's algorithm.<sup>2</sup> Altogether, The implemented solvent library consists of 187 entries (Table S10). Alternatively, any arbitrary solvent can be specified manually. The employed standard atomic weights are given in Table S11.

Table S10: Solvent library containing the relative permittivity ( $\epsilon_r$ ), molar mass ( $M$  in g/mol), density ( $\rho$  in g/cm<sup>3</sup>), and molecular van der Waals volume ( $V_{vdW}$  in Å<sup>3</sup>).

| Entry | Solvent                   | $\epsilon_r^{[a]}$ | $M^{[a]}$ | $\rho^{[a]}$ | $V_{vdW}^{[b]}$ |
|-------|---------------------------|--------------------|-----------|--------------|-----------------|
| 1     | Acetaldehyde              | 21                 | 44.052    | 0.7834       | 44.86           |
| 2     | Acetic Acid               | 6.2                | 60.052    | 1.0446       | 52.62           |
| 3     | Acetone                   | 21.01              | 58.079    | 0.7845       | 60.09           |
| 4     | Acetonitrile              | 36.64              | 41.052    | 0.7857       | 43.4            |
| 5     | Acetophenone              | 17.44              | 120.149   | 1.0281       | 113.23          |
| 6     | Aniline                   | 7.06               | 93.127    | 1.0217       | 89.28           |
| 7     | Anisole                   | 4.3                | 108.138   | 0.994        | 102.4           |
| 8     | Argon                     | 1.3247             | 39.948    | 1.396        | 27.83           |
| 9     | Benzaldehyde              | 17.85              | 106.122   | 1.0401       | 98.12           |
| 10    | Benzene                   | 2.2825             | 78.112    | 0.8765       | 78.86           |
| 11    | Benzonitrile              | 25.9               | 103.122   | 1.0093       | 96.68           |
| 12    | Benzyl Alcohol            | 11.916             | 108.138   | 1.0419       | 102.37          |
| 13    | Bromobenzene              | 5.45               | 157.008   | 1.495        | 97.61           |
| 14    | Bromoethane               | 9.01               | 108.965   | 1.4604       | 59.93           |
| 15    | Bromoform                 | 4.404              | 252.731   | 2.8788       | 82.5            |
| 16    | 1-Bromo-2-methylpropane   | 7.7                | 137.018   | 1.272        | 90.43           |
| 17    | 1-Bromooctane             | 5.0957             | 193.125   | 1.1072       | 151.74          |
| 18    | 1-Bromopentane            | 6.31               | 151.045   | 1.2182       | 105.83          |
| 19    | 1-Bromopropane            | 8.09               | 122.992   | 1.3537       | 75.22           |
| 20    | 2-Bromopropane            | 9.46               | 122.992   | 1.314        | 75.16           |
| 21    | Butanal                   | 13.45              | 72.106    | 0.8016       | 75.41           |
| 22    | Butanoic Acid             | 2.98               | 88.106    | 0.9528       | 83.25           |
| 23    | 1-Butanol                 | 17.84              | 74.121    | 0.8095       | 79.59           |
| 24    | 2-Butanol                 | 17.26              | 74.121    | 0.8063       | 79.62           |
| 25    | Butanone                  | 18.56              | 72.106    | 0.7999       | 75.32           |
| 26    | Butyronitrile             | 24.83              | 69.106    | 0.7936       | 74.01           |
| 27    | Butylamine                | 4.71               | 73.137    | 0.7414       | 82.22           |
| 28    | <i>n</i> -Butylbenzene    | 2.359              | 134.218   | 0.8601       | 139.97          |
| 29    | <i>sec</i> -Butylbenzene  | 2.357              | 134.218   | 0.8621       | 139.87          |
| 30    | <i>tert</i> -Butylbenzene | 2.359              | 134.218   | 0.8665       | 139.43          |
| 31    | Butyl Acetate             | 5.07               | 116.158   | 0.8825       | 114.22          |
| 32    | Carbon Disulfide          | 2.632              | 76.141    | 1.2632       | 52.39           |
| 33    | Carbon Tetrachloride      | 2.2379             | 153.823   | 1.594        | 84.07           |
| 34    | Chlorobenzene             | 5.6895             | 112.557   | 1.1058       | 93.34           |
| 35    | 2-Chlorobutane            | 8.564              | 92.567    | 0.8857       | 86.1            |
| 36    | Chloroform                | 4.8069             | 119.378   | 1.4788       | 69.55           |
| 37    | 1-Chlorohexane            | 6.104              | 120.62    | 0.8781       | 116.78          |
| 38    | 1-Chloropentane           | 6.654              | 106.594   | 0.882        | 101.47          |
| 39    | 1-Chloropropane           | 8.588              | 78.541    | 0.8899       | 70.87           |
| 40    | <i>m</i> -Chlorotoluene   | 5.763              | 126.584   | 1.075        | 108.55          |
| 41    | <i>o</i> -Chlorotoluene   | 4.721              | 126.584   | 1.0825       | 108.41          |
| 42    | <i>p</i> -Chlorotoluene   | 6.25               | 126.584   | 1.0697       | 108.55          |

| 3     | Black-Box                     | Algorithm          | for       | Solvation    | Entropy         |
|-------|-------------------------------|--------------------|-----------|--------------|-----------------|
| Entry | Solvent                       | $\epsilon_r^{[a]}$ | $M^{[a]}$ | $\rho^{[a]}$ | $V_{vdW}^{[b]}$ |
| 43    | <i>m</i> -Cresol              | 12.44              | 108.138   | 1.0339       | 102.01          |
| 44    | <i>o</i> -Cresol              | 6.76               | 108.138   | 1.0327       | 101.91          |
| 45    | Cyclohexane                   | 2.0243             | 84.159    | 0.7739       | 92.15           |
| 46    | Cyclohexanone                 | 16.1               | 98.142    | 0.9478       | 96.22           |
| 47    | Cyclopentane                  | 1.9687             | 70.133    | 0.7457       | 77.71           |
| 48    | Cyclopentanol                 | 18.5               | 86.132    | 0.9488       | 85.91           |
| 49    | Cyclopentanone                | 13.58              | 84.117    | 0.9487       | 81.65           |
| 50    | Decalin                       | 2.201              | 138.25    | 0.8812       | 143.41          |
| 51    | <i>cis</i> -Decalin           | 2.219              | 138.25    | 0.8965       | 143.47          |
| 52    | <i>trans</i> -Decalin         | 2.184              | 138.25    | 0.8659       | 143.35          |
| 53    | <i>n</i> -Decane              | 1.9853             | 142.282   | 0.7266       | 163.17          |
| 54    | 1-Decanol                     | 7.93               | 158.281   | 0.8297       | 171.41          |
| 55    | 1-Decene                      | 2.136              | 140.266   | 0.7408       | 159.03          |
| 56    | 1,2-Dibromoethane             | 4.9612             | 187.861   | 2.1683       | 79.08           |
| 57    | Dibutyl Ether                 | 3.083              | 130.228   | 0.7684       | 141.12          |
| 58    | <i>o</i> -Dichlorobenzene     | 10.12              | 147.002   | 1.3059       | 107.61          |
| 59    | 1,1-Dichloroethane            | 10.1               | 98.959    | 1.1757       | 70.21           |
| 60    | 1,2-Dichloroethane            | 10.42              | 98.959    | 1.2454       | 70.35           |
| 61    | <i>E</i> -1,2-Dichloroethene  | 2.14               | 96.943    | 1.2565       | 65.68           |
| 62    | <i>Z</i> -1,2-Dichloroethene  | 9.2                | 96.943    | 1.2837       | 65.51           |
| 63    | Dichloromethane               | 8.93               | 84.933    | 1.3266       | 54.98           |
| 64    | Diethylamine                  | 3.68               | 73.137    | 0.7056       | 82.55           |
| 65    | Diethyl Ether                 | 4.2666             | 74.121    | 0.7138       | 79.92           |
| 66    | Diethyl Sulfide               | 5.723              | 90.187    | 0.8362       | 90.09           |
| 67    | Diglyme                       | 7.23               | 134.173   | 0.94342      | 127.81          |
| 68    | Diiodomethane                 | 5.32               | 267.836   | 3.3211       | 76.38           |
| 69    | Diisopropyl Ether             | 3.805              | 102.174   | 0.7192       | 110.56          |
| 70    | <i>N,N</i> -Dimethylacetamide | 38.85              | 87.12     | 0.9372       | 86.16           |
| 71    | Dimethyl Disulfide            | 9.6                | 94.199    | 1.0625       | 78.22           |
| 72    | <i>N,N</i> -Dimethylformamide | 38.25              | 73.094    | 0.9445       | 71.21           |
| 73    | 2,4-Dimethylpentane           | 1.902              | 100.202   | 0.6727       | 117.06          |
| 74    | 2,4-Dimethylpyridine          | 9.6                | 107.153   | 0.9309       | 105.22          |
| 75    | 2,6-Dimethylpyridine          | 7.33               | 107.153   | 0.9226       | 105.22          |
| 76    | Dimethyl Sulfoxide            | 47.24              | 78.133    | 1.101        | 67.36           |
| 77    | 1,4-Dioxane                   | 2.2189             | 88.106    | 1.0337       | 79.04           |
| 78    | <i>n</i> -Dodecane            | 2.012              | 170.334   | 0.7495       | 193.78          |
| 79    | Diphenyl Ether                | 3.726              | 170.206   | 1.06613      | 155.64          |
| 80    | Dipropylamine                 | 2.923              | 101.19    | 0.74         | 113.15          |
| 81    | 1,2-Ethanediol                | 41.4               | 62.068    | 1.1135       | 57.28           |
| 82    | Ethanethiol                   | 6.667              | 62.134    | 0.8315       | 59.1            |
| 83    | Ethanol                       | 25.3               | 46.068    | 0.7893       | 48.99           |
| 84    | Ethylbenzene                  | 2.4463             | 106.165   | 0.8626       | 109.38          |
| 85    | Ethylene                      | 1.4833             | 28.053    | 0.5678       | 36.72           |
| 86    | Ethyl Acetate                 | 6.0814             | 88.106    | 0.9003       | 83.62           |

| 3     | Black-Box                         | Algorithm          | for       | Solvation    | Entropy         |
|-------|-----------------------------------|--------------------|-----------|--------------|-----------------|
| Entry | Solvent                           | $\epsilon_r^{[a]}$ | $M^{[a]}$ | $\rho^{[a]}$ | $V_{vdW}^{[b]}$ |
| 87    | Ethyl Formate                     | 8.57               | 74.079    | 0.9208       | 68.47           |
| 88    | Ethyl Phenyl Ether                | 4.216              | 122.164   | 0.9651       | 117.68          |
| 89    | Fluorobenzene                     | 5.465              | 96.102    | 1.0225       | 84.23           |
| 90    | 1-Fluorooctane                    | 3.89               | 132.219   | 0.8116       | 138.19          |
| 91    | Formamide                         | 111                | 45.041    | 1.1334       | 39.81           |
| 92    | Formic Acid                       | 51.1               | 46.026    | 1.22         | 37.44           |
| 93    | Helium                            | 1.055683           | 4.0026    | 0.141227     | 11.49           |
| 94    | Heptane                           | 1.9209             | 100.202   | 0.6795       | 117.26          |
| 95    | 1-Heptanol                        | 11.75              | 116.201   | 0.8219       | 125.5           |
| 96    | 2-Heptanone                       | 11.95              | 114.185   | 0.8111       | 121.23          |
| 97    | 4-Heptanone                       | 12.6               | 114.185   | 0.8174       | 121.18          |
| 98    | <i>n</i> -Hexadecane              | 2.046              | 226.441   | 0.7701       | 255             |
| 99    | 1,1,1,3,3,3-Hexafluoro-2-propanol | 16.7               | 168.037   | 1.46         | 96.48           |
| 100   | <i>n</i> -Hexane                  | 1.8865             | 86.175    | 0.6606       | 101.95          |
| 101   | Hexanoic Acid                     | 2.6                | 116.158   | 0.9212       | 113.76          |
| 102   | 1-Hexanol                         | 13.03              | 102.174   | 0.8136       | 110.19          |
| 103   | 2-Hexanone                        | 14.56              | 100.158   | 0.81132      | 105.93          |
| 104   | 1-Hexene                          | 2.077              | 84.159    | 0.6685       | 97.82           |
| 105   | 1-Hexyne                          | 2.621              | 82.143    | 0.7155       | 94.07           |
| 106   | Iodobenzene                       | 4.59               | 204.008   | 1.8308       | 104             |
| 107   | 1-Iodobutane                      | 6.27               | 184.018   | 1.6154       | 96.89           |
| 108   | Iodoethane                        | 7.82               | 155.965   | 1.9357       | 66.29           |
| 109   | 1-Iodohexadecane                  | 3.57               | 352.337   | 1.1213       | 280.53          |
| 110   | Iodomethane                       | 6.97               | 141.939   | 2.2789       | 50.96           |
| 111   | 1-Iodopentane                     | 5.78               | 198.045   | 1.5161       | 112.19          |
| 112   | 1-Iodopropane                     | 7.07               | 169.992   | 1.7489       | 81.58           |
| 113   | Isopentane                        | 1.845              | 72.149    | 0.6201       | 86.56           |
| 114   | Isopropylbenzene                  | 2.381              | 120.191   | 0.864        | 124.61          |
| 115   | <i>p</i> -Isopropyltoluene        | 2.2322             | 134.218   | 0.8573       | 139.81          |
| 116   | Isoquinoline                      | 11                 | 129.159   | 1.091        | 117.08          |
| 117   | Krypton                           | 1.664              | 83.8      | 2.418        | 34.53           |
| 118   | Mesitylene                        | 2.279              | 120.191   | 0.8615       | 124.47          |
| 119   | Methanol                          | 33                 | 32.042    | 0.7914       | 33.74           |
| 120   | 2-Methoxyethanol                  | 17.2               | 76.095    | 0.9647       | 72.94           |
| 121   | <i>N</i> -Methylaniline           | 5.96               | 107.153   | 0.9891       | 104.88          |
| 122   | Methyl Benzoate                   | 6.642              | 136.149   | 1.0837       | 121.47          |
| 123   | Methyl Butyrate                   | 5.48               | 102.132   | 0.8984       | 98.88           |
| 124   | Methylcyclohexane                 | 2.024              | 98.186    | 0.7694       | 107.34          |
| 125   | Methyl Acetate                    | 7.07               | 74.079    | 0.9342       | 68.33           |
| 126   | Methyl Formate                    | 9.2                | 60.052    | 0.9713       | 53.18           |
| 127   | 2-Methylpentane                   | 1.886              | 86.175    | 0.65         | 101.87          |
| 128   | 4-Methyl-2-pentanone              | 13.11              | 100.158   | 0.7965       | 105.87          |
| 129   | Methyl Propionate                 | 6.2                | 88.106    | 0.915        | 83.58           |
| 130   | 2-Methyl-1-propanol               | 17.93              | 74.121    | 0.8018       | 79.53           |

| 3     | Black-Box              | Algorithm          | for       | Solvation    | Entropy         |
|-------|------------------------|--------------------|-----------|--------------|-----------------|
| Entry | Solvent                | $\epsilon_r^{[a]}$ | $M^{[a]}$ | $\rho^{[a]}$ | $V_{vdW}^{[b]}$ |
| 131   | 2-Methyl-2-propanol    | 12.47              | 74.121    | 0.7887       | 79.44           |
| 132   | 2-Methylpyridine       | 10.18              | 93.127    | 0.9443       | 90.03           |
| 133   | 3-Methylpyridine       | 11.1               | 93.127    | 0.9566       | 90.04           |
| 134   | 4-Methylpyridine       | 12.2               | 93.127    | 0.9548       | 90.03           |
| 135   | Neon                   | 1.1907             | 20.18     | 1.204        | 15.3            |
| 136   | Nitrobenzene           | 35.6               | 123.11    | 1.2037       | 102.14          |
| 137   | Nitroethane            | 29.11              | 75.067    | 1.0448       | 64.33           |
| 138   | Nitromethane           | 37.27              | 61.041    | 1.1371       | 49.18           |
| 139   | 1-Nitropropane         | 24.7               | 89.094    | 0.9961       | 79.63           |
| 140   | 2-Nitropropane         | 26.74              | 89.094    | 0.9821       | 79.72           |
| 141   | <i>o</i> -Nitrotoluene | 26.26              | 137.137   | 1.1611       | 117.14          |
| 142   | <i>n</i> -Nonane       | 1.9722             | 128.255   | 0.7192       | 147.87          |
| 143   | 1-Nonanol              | 8.83               | 144.254   | 0.828        | 156.1           |
| 144   | 5-Nonanone             | 10.6               | 142.238   | 0.8217       | 151.78          |
| 145   | <i>n</i> -Octane       | 1.948              | 114.229   | 0.6986       | 132.56          |
| 146   | <i>n</i> -Octanol      | 10.3               | 130.228   | 0.8262       | 140.8           |
| 147   | 2-Octanone             | 9.51               | 128.212   | 0.82         | 136.53          |
| 148   | <i>n</i> -Pentadecane  | 2.0391             | 212.415   | 0.7685       | 239.69          |
| 149   | Pentanal               | 10                 | 86.132    | 0.8095       | 90.71           |
| 150   | <i>n</i> -Pentane      | 1.8371             | 72.149    | 0.6262       | 86.65           |
| 151   | Pentanoic Acid         | 2.661              | 102.132   | 0.9339       | 98.46           |
| 152   | 1-Pentanol             | 15.13              | 88.148    | 0.8144       | 94.89           |
| 153   | 2-Pentanone            | 15.45              | 86.132    | 0.809        | 90.63           |
| 154   | 3-Pentanone            | 17                 | 86.132    | 0.8098       | 90.55           |
| 155   | 1-Pentene              | 2.011              | 70.133    | 0.6405       | 82.51           |
| 156   | Pentylamine            | 4.27               | 87.164    | 0.7544       | 97.52           |
| 157   | Pentyl Acetate         | 4.79               | 130.185   | 0.8756       | 129.52          |
| 158   | Hexafluorobenzene      | 2.029              | 186.054   | 1.6184       | 110.99          |
| 159   | Propanal               | 18.5               | 58.079    | 0.8657       | 60.1            |
| 160   | Propanoic Acid         | 3.44               | 74.079    | 0.9882       | 67.86           |
| 161   | 1-Propanol             | 20.8               | 60.095    | 0.7997       | 64.28           |
| 162   | 2-Propanol             | 20.18              | 60.095    | 0.7809       | 64.25           |
| 163   | Propionitrile          | 29.7               | 55.079    | 0.7818       | 58.73           |
| 164   | Allyl Alcohol          | 19.7               | 58.079    | 0.854        | 60.19           |
| 165   | Propylamine            | 5.08               | 59.11     | 0.7173       | 66.91           |
| 166   | Propyl Acetate         | 5.62               | 102.132   | 0.8878       | 98.91           |
| 167   | Pyridine               | 13.26              | 79.101    | 0.9819       | 74.84           |
| 168   | Quinoline              | 9.16               | 129.159   | 1.0977       | 117.1           |
| 169   | Tetrachloroethene      | 2.268              | 165.833   | 1.623        | 94.08           |
| 170   | Tetrahydrofuran        | 7.52               | 72.106    | 0.8833       | 71.1            |
| 171   | Tetralin               | 2.771              | 132.202   | 0.9645       | 130.03          |
| 172   | Thiophene              | 2.739              | 84.14     | 1.0649       | 71.5            |
| 173   | Thiophenol             | 4.26               | 110.177   | 1.0775       | 96.88           |
| 174   | Toluene                | 2.379              | 92.139    | 0.8668       | 94.06           |

| Entry | Solvent                | $\epsilon_r^{[a]}$ | $M^{[a]}$ | $\rho^{[a]}$ | $V_{vdW}^{[b]}$ |
|-------|------------------------|--------------------|-----------|--------------|-----------------|
| 175   | 1,1,1-Trichloroethane  | 7.243              | 133.404   | 1.339        | 84.76           |
| 176   | 1,1,2-Trichloroethane  | 7.1937             | 133.404   | 1.4397       | 84.91           |
| 177   | Trichloroethene        | 3.39               | 131.388   | 1.4642       | 79.9            |
| 178   | Triethylamine          | 2.418              | 101.19    | 0.7275       | 113.32          |
| 179   | 2,2,2-Trifluoroethanol | 27.68              | 100.039   | 1.3842       | 65.13           |
| 180   | 1,2,4-Trimethylbenzene | 2.377              | 120.191   | 0.8758       | 124.34          |
| 181   | 2,2,4-Trimethylpentane | 1.943              | 114.229   | 0.6878       | 132.17          |
| 182   | <i>n</i> -Undecane     | 1.9972             | 156.309   | 0.7402       | 178.47          |
| 183   | Water                  | 80.1               | 18.015    | 0.998        | 17.69           |
| 184   | Xenon                  | 1.88               | 131.29    | 2.953        | 42.21           |
| 185   | <i>m</i> -Xylene       | 2.359              | 106.165   | 0.8596       | 109.27          |
| 186   | <i>o</i> -Xylene       | 2.562              | 106.165   | 0.8802       | 109.12          |
| 187   | <i>p</i> -Xylene       | 2.2735             | 106.165   | 0.8566       | 109.27          |

[a] Unless stated otherwise taken from ref. <sup>7</sup>. [b] Analytical van der Waals volume of the optimized molecular structure (PBEh-3c) using Petitjean's algorithm as described above.<sup>2</sup>

Table S11: Standard atomic weights of the elements (1 December 2018, IUPAC).

| Element    | Symbol | Atomic Number | Standard Atomic Weight |
|------------|--------|---------------|------------------------|
| hydrogen   | H      | 1             | 1.008                  |
| helium     | He     | 2             | 4.0026                 |
| lithium    | Li     | 3             | 6.94                   |
| beryllium  | Be     | 4             | 9.0122                 |
| boron      | B      | 5             | 10.81                  |
| carbon     | C      | 6             | 12.011                 |
| nitrogen   | N      | 7             | 14.007                 |
| oxygen     | O      | 8             | 15.999                 |
| fluorine   | F      | 9             | 18.998                 |
| neon       | Ne     | 10            | 20.18                  |
| sodium     | Na     | 11            | 22.99                  |
| magnesium  | Mg     | 12            | 24.305                 |
| aluminium  | Al     | 13            | 26.982                 |
| silicon    | Si     | 14            | 28.085                 |
| phosphorus | P      | 15            | 30.974                 |
| sulfur     | S      | 16            | 32.06                  |
| chlorine   | Cl     | 17            | 35.45                  |
| argon      | Ar     | 18            | 39.95                  |
| potassium  | K      | 19            | 39.098                 |
| calcium    | Ca     | 20            | 40.078                 |
| scandium   | Sc     | 21            | 44.956                 |
| titanium   | Ti     | 22            | 47.867                 |
| vanadium   | V      | 23            | 50.942                 |
| chromium   | Cr     | 24            | 51.996                 |
| manganese  | Mn     | 25            | 54.938                 |
| iron       | Fe     | 26            | 55.845                 |

| 3            | Black-Box | Algorithm     | for                    | Solvation | Entropy |
|--------------|-----------|---------------|------------------------|-----------|---------|
| Element      | Symbol    | Atomic Number | Standard Atomic Weight |           |         |
| cobalt       | Co        | 27            | 58.933                 |           |         |
| nickel       | Ni        | 28            | 58.693                 |           |         |
| copper       | Cu        | 29            | 63.546                 |           |         |
| zinc         | Zn        | 30            | 65.38                  |           |         |
| gallium      | Ga        | 31            | 69.723                 |           |         |
| germanium    | Ge        | 32            | 72.63                  |           |         |
| arsenic      | As        | 33            | 74.922                 |           |         |
| selenium     | Se        | 34            | 78.971                 |           |         |
| bromine      | Br        | 35            | 79.904                 |           |         |
| krypton      | Kr        | 36            | 83.798                 |           |         |
| rubidium     | Rb        | 37            | 85.468                 |           |         |
| strontium    | Sr        | 38            | 87.62                  |           |         |
| yttrium      | Y         | 39            | 88.906                 |           |         |
| zirconium    | Zr        | 40            | 91.224                 |           |         |
| niobium      | Nb        | 41            | 92.906                 |           |         |
| molybdenum   | Mo        | 42            | 95.95                  |           |         |
| ruthenium    | Ru        | 44            | 101.07                 |           |         |
| rhodium      | Rh        | 45            | 102.91                 |           |         |
| palladium    | Pd        | 46            | 106.42                 |           |         |
| silver       | Ag        | 47            | 107.87                 |           |         |
| cadmium      | Cd        | 48            | 112.41                 |           |         |
| indium       | In        | 49            | 114.82                 |           |         |
| tin          | Sn        | 50            | 118.71                 |           |         |
| antimony     | Sb        | 51            | 121.76                 |           |         |
| tellurium    | Te        | 52            | 127.6                  |           |         |
| iodine       | I         | 53            | 126.9                  |           |         |
| xenon        | Xe        | 54            | 131.29                 |           |         |
| caesium      | Cs        | 55            | 132.91                 |           |         |
| barium       | Ba        | 56            | 137.33                 |           |         |
| lanthanum    | La        | 57            | 138.91                 |           |         |
| cerium       | Ce        | 58            | 140.12                 |           |         |
| praseodymium | Pr        | 59            | 140.91                 |           |         |
| neodymium    | Nd        | 60            | 144.24                 |           |         |
| samarium     | Sm        | 62            | 150.36                 |           |         |
| europium     | Eu        | 63            | 151.96                 |           |         |
| gadolinium   | Gd        | 64            | 157.25                 |           |         |
| terbium      | Tb        | 65            | 158.93                 |           |         |
| dysprosium   | Dy        | 66            | 162.5                  |           |         |
| holmium      | Ho        | 67            | 164.93                 |           |         |
| erbium       | Er        | 68            | 167.26                 |           |         |
| thulium      | Tm        | 69            | 168.93                 |           |         |
| ytterbium    | Yb        | 70            | 173.05                 |           |         |
| lutetium     | Lu        | 71            | 174.97                 |           |         |
| hafnium      | Hf        | 72            | 178.49                 |           |         |
| tantalum     | Ta        | 73            | 180.95                 |           |         |
| tungsten     | W         | 74            | 183.84                 |           |         |

| Element      | Symbol | Atomic Number | Standard Atomic Weight |
|--------------|--------|---------------|------------------------|
| rhenium      | Re     | 75            | 186.21                 |
| osmium       | Os     | 76            | 190.23                 |
| iridium      | Ir     | 77            | 192.22                 |
| platinum     | Pt     | 78            | 195.08                 |
| gold         | Au     | 79            | 196.97                 |
| mercury      | Hg     | 80            | 200.59                 |
| thallium     | Tl     | 81            | 204.38                 |
| lead         | Pb     | 82            | 207.2                  |
| bismuth      | Bi     | 83            | 208.98                 |
| thorium      | Th     | 90            | 232.04                 |
| protactinium | Pa     | 91            | 231.04                 |
| uranium      | U      | 92            | 238.03                 |

### 3.4 Numerical Examples

The script 'calcEntropySolv' calculates the solvation entropy of a given solute in the specified solvent. Figure S4 shows a representative example for the routine calculation of the solvation entropy and solution-phase entropy of pyridone (specified as output file from preceding ORCA computation) in benzene at 298 K. Likewise, the solvation entropy can be calculated from the atomic coordinates specified as XYZ file in xmol format (Figure S5). More options are invoked by setting different flags. An example illustrating the optional modifications is provided in Figure S6. Thus, manual solvent specification (permittivity [-P], molar mass [-M], density [-D], molecular vdW volume [-V], deuteration [-d]), and change in rotational symmetry number [-S], and temperature [-T] are implemented. The availability of *solvent* as solvent is checked with 'readSolventLibrary *solvent*'. Furthermore, if the solute is at the time the solvent, then a different standard state correction must be applied [-c without additional arguments] (not shown below). Besides the direct output, two output files are generated as TXT files that summarize the data during the calculation. One file gives a detailed documentation on the calculation of the molecular vdW volume of the solute, and the second file summarizes the entropy-related calculation following Garza's formalism for documentation purposes.



```

.../files-computations/temp$ calcEntropySolv pyridone.out -s benzene
Input: pyridone.out
Output: pyridone_EntropySolv_benzene.txt
Read solvent parameters:
Solvent: benzene
Permittivity: 2.2825
Density: 0.8765 g/mL
Molar Mass: 78.112 g/mol
vdW-Volume: 78.85700 Ang**3
-----
Calculate solute parameters...
Calculate the vdW-Volume...
Calculate the Radius of Gyration...
-----
Solute parameters (12 atoms):
vdW-Volume: 82.82649 Ang**3
Molecular Mass: 95.101 amu
Gyradius: 2.052169 Ang
S_rot_gas (PG Cs, Sn 1): 26.758 cal/mol*K
30 vibrational frequencies (not printed for clarity)
-----
Calculate S_trans...
Info: Cavity volume: 606.164 Ang**3
Info: Number of accessible cavities: 1.00 (typically 1 unless small solute in bulky/low density solvents)
Calculate S_rot...
Calculate S_vib...
Calculate S_cav...
Calculate S_conc...
Info: Standard state correction for 1 bar -> 1 M
-----
All Entropies in cal/mol*K at 298.15 K (1 bar -> 1 M):
S_trans_diff: -8.382  $\Delta_{\text{solv}} S^{\text{trans}}$ 
S_rot_diff: -2.955  $\Delta_{\text{solv}} S^{\text{rot}}$ 
S_trans: 31.212  $S^{\text{trans}}$ 
S_rot: 23.803  $S^{\text{rot}}$ 
S_vib: 7.055  $S^{\text{vib}}$ 
S_cav: -1.143  $S^{\text{cav}}$ 
S_conc: -6.380  $S^{\text{conc}}$ 
-----
S_solv: -18.861  $\Delta_{\text{solv}} S^{\circ}$ 
S_soln: 54.546  $S^{\circ}_{\text{soln}}$ 

```

Figure S4: Routine application of the 'calcEntropySolv' script to calculate the solvation entropy and solution-phase entropy of a given solute specified as output file from preceding ORCA computation (here: entropy of pyridone in benzene at 298 K).

```

:../files-computations/temp$ calcEntropySolv pyridone.xyz -s benzene
Input: pyridone.xyz
Output: pyridone_EntropySolv_benzene.txt
Read solvent parameters:
Solvent: benzene
Permittivity: 2.2825
Density: 0.8765 g/mL
Molar Mass: 78.112 g/mol
vdW-Volume: 78.85700 Ang**3
-----
Calculate solute parameters...
Calculate the vdW-Volume...
Calculate the Radius of Gyration...
-----
Solute parameters (12 atoms):
vdW-Volume: 82.82649 Ang**3
Molecular Mass: 95.101 amu
Gyradius: 2.052169 Ang
0 vibrational frequencies (not printed for clarity)
-----
Calculate S_trans...
Info: Cavity volume: 606.164 Ang**3
Info: Number of accessible cavities: 1.00 (typically 1 unless small solute in bulky/low density solvents)
Calculate S_rot...
Calculate S_cav...
Calculate S_conc...
Info: Standard state correction for 1 bar -> 1 M
-----
All Entropies in cal/mol*K at 298.15 K (1 bar -> 1 M):
S_trans_diff: -8.382
S_rot_diff: -2.955
S_trans: 31.212
S_cav: -1.143
S_conc: -6.380
-----
S_solv: -18.861
```

Figure S5: Routine application of the 'calcEntropySolv' script to calculate the solvation entropy a given solute specified as XYZ file (here: entropy of pyridone in benzene at 298 K).

```

.../files-computations/temp$ calcEntropySolv pyridone.out -s benzene -T 310 -P 2 -M 80 -D 0.9 -V 80 -S 2 -d 6
Requested Symmetry Number: 2
Requested degree of deuteration: d6
Input: pyridone.out
Output: pyridone_EntropySolv_benzene.txt
Solvent Density is modified by hand: 0.9
Solvent Molar Mass is modified by hand: 80
Solvent vdW-Volume is modified by hand: 80
Solvent Permittivity is modified by hand: 2
Read solvent parameters:
Solvent: benzene-d6
Permittivity: 2
Density: 0.968 g/mL
Molar Mass: 86.036 g/mol
vdW-Volume: 80 Ang**3
-----
Calculate solute parameters...
Calculate the vdW-Volume...
Calculate the Radius of Gyration...
-----
Solute parameters (12 atoms):
vdW-Volume: 82.82649 Ang**3
Molecular Mass: 95.101 amu
Gyradius: 2.052169 Ang
S_rot_gas (PG Cs, Sn 1-->2): 25.497 cal/mol*K
30 vibrational frequencies (not printed for clarity)
-----
Calculate S_trans...
Info: Cavity volume: 599.598 Ang**3
Info: Number of accessible cavities: 1.00 (typically 1 unless small solute in bulky/low density solvents)
Calculate S_rot...
Calculate S_vib...
Calculate S_cav...
Calculate S_conc...
Info: Standard state correction for 1 bar -> 1 M
-----
All Entropies in cal/mol*K at 310 K (1 bar -> 1 M):
S_trans_diff: -8.481
S_rot_diff: -2.969
S_trans: 31.307
S_rot: 22.528
S_vib: 7.595
S_cav: -0.929
S_conc: -6.457
-----
S_solv: -18.837
S_soln: 54.042

```

Figure S6: Expert application of the 'calcEntropySolv' script to calculate the solvation entropy and solution-phase entropy of a given solute specified as output file from preceding ORCA computation (here: entropy of pyridone with a rotational symmetry number of 2 in arbitrarily modified benzene-d<sub>6</sub> at 310 K).

## References

1. A. J. Garza, *J. Chem. Theory Comput.*, 2019, **15**, 3204.
2. M. Petitjean, *J. Comput. Chem.*, 1994, **15**, 507.
3. S. Grimme, *Chem. Eur. J.*, 2012, **18**, 9955.
4. A. Bondi, *J. Phys. Chem.*, 1964, **68**, 441.
5. R. S. Rowland and R. Taylor, *J. Phys. Chem.*, 1996, **100**, 7384.
6. M. Mantina, A. C. Chamberlin, R. Valero, C. J. Cramer and D. G. Truhlar, *J. Phys. Chem. A*, 2009, **113**, 5806.
7. D. R. Lide, *CRC Handbook of Chemistry and Physics, Internet Version 2005*, CRC Press, Boca Raton, FL, 2005.
